# Supplementary material for: DNA Methylation Changes Associated with Antipsychotic Serum Concentrations in Patients with Psychosis.
Source: Research Square preprint supplement (doi:10.21203/rs.3.rs-8309238/v1), 2026-01-20
Supplement: Supplementary file 2 [file 21d73a50d9f5be22a3322704.xlsx]

## Sheet: Overview
Supplementary tables for paper "DNA Methylation Changes Associated with Antipsychotic Serum Concentrations in Patients with Psychosis."
SM Table 1	Dunn Test of Age Comparison APs vs Med-free (Age Range 18-53)
SM Table 2	Overview of DMPs from meta-analysis for the Common Effects model (BH p < 0.05)
SM Table 3	Overview of Significantly Enriched GO terms Associated with Meta-analysis DMPs with methylGLM (FDR < 0.05)
SM Table 4	Overview of GO Terms Identified with DMR Genes (nominal p < 0.05)
SM Table 5	Overview of DMPs Associated with the Specific Effects of Olanzapine (nominal p.value < 0.05 and Δmethylation > 2%)
SM Table 6	Overview of DMPs Associated with the Specific Effects of Quetiapine (nominal p.value < 0.05 and Δmethylation > %)
SM Table 7	Overview of DMPs Associated with the Specific Effects of Risperidone (nominal p.value < 0.05 and Δmethylation > 3%)
SM Table 8	Overview of Top DMRs for Specific Effects (nominal p < 0.05)

## Sheet: SM Table 1 
SM Table 2: Dunn Test of Age Comparison APs vs Med-free (Age Range 18-53)
Comparison		Z	P.value	FDR P.adj
Med-free vs Olanzapine		-2.018	0.0218	0.1308
Med-free vs Quetiapine		1.507	0.06589	0.3953
Olanzapine vs Quetiapine		2.707	0.003399	0.0204
Med-free vs Risperidone		-0.2225	0.412	1
Olanzapine vs Risperidone		0.9338	0.1752	1
Quetiapine vs Risperidone		-1.284	0.0995	0.597

## Sheet: SM Table 2
SM Table 1: Overview of DMPs from meta-analysis Common Effects model (BH p < 0.05)
N_cohorts	CpGs	All_Effect_Fixed	All_Effect_SE_Fixed	All_P_Fixed	All_Effect_Random	All_Effect_SE_Random	All_P_Random	All_tau	All_I2	All_Q	All_Het P	logFC_Ola	SE_Ola	logFC_Que	SE_Que	logFC_Ris	SE_Ris	gene
3	cg14148107	-0.0102766	0.00114514	2.8581e-19	-0.0109349	0.00264779	3.63053e-05	0.0025141	0	1.41693	0.4924	-0.0194931	0.008825	-0.0101105	0.001155	-0.0600419	0.0900308
3	cg25098418	0.00393163	0.000481051	3.00805e-16	-0.000165877	0.00488839	0.972931	0.00628961	0.60435	5.05497	0.0798595	-0.00597412	0.00463452	0.00404236	0.000483682	-0.0318766	0.0543461	FGGY;FGGY;FGGY;FGGY
3	cg02854676	-0.00399392	0.000494125	6.32819e-16	-0.00399392	0.000494125	6.32819e-16	0	0	0.215003	0.898075	-0.00455648	0.00348947	-0.0039807	0.00049917	-0.0313434	0.063025
3	cg26872780	0.00980324	0.00128809	2.72708e-14	0.00980324	0.00128809	2.72708e-14	0	0	1.05994	0.588622	0.0181363	0.00851265	0.00960487	0.00130315	0.05292	0.153864	EPC2
3	cg06922599	-0.0152103	0.00203731	8.27686e-14	-0.00888267	0.00846536	0.294042	0.0102995	0.74381	7.80671	0.0201741	-6.61907e-05	0.0101011	-0.0159498	0.00208048	0.226824	0.103842
3	cg11517217	0.0174326	0.00246175	1.42715e-12	0.0173206	0.00332762	1.93898e-07	0.00240866	0	1.20912	0.546314	0.013747	0.0107061	0.0175896	0.00252996	0.159985	0.136744
3	cg10207218	0.00584908	0.000867666	1.57121e-11	0.00584908	0.000867666	1.57121e-11	0	0	0.723957	0.696297	0.0101547	0.00584115	0.00575544	0.000877442	-0.0311761	0.0900071
3	cg15236453	-0.00704098	0.00104852	1.87841e-11	-0.0403256	0.0445631	0.365513	0.0737304	0.865433	14.8625	0.000592443	0.00763825	0.00735151	-0.00725973	0.00105967	-0.148088	0.0428543
3	cg22911931	0.00663589	0.00100393	3.84565e-11	0.00663589	0.00100393	3.84565e-11	0	0	1.07291	0.584817	0.00316324	0.00669507	0.00672594	0.00101548	-0.0741776	0.0905782
3	cg12677359	-0.00168262	0.000254691	3.93489e-11	0.000406952	0.00242101	0.866511	0.00324239	0.756959	8.22905	0.0163337	0.00320101	0.00172262	-0.00179208	0.000257538	0.000718426	0.0226746	AUH;AUH
3	cg16562776	0.0152463	0.0023344	6.5257e-11	0.0152463	0.0023344	6.5257e-11	0	0.730248	7.41422	0.0245483	0.0139001	0.011609	0.01508	0.00238448	0.203739	0.0693105
3	cg21838354	0.0119798	0.00185307	1.01403e-10	0.0119798	0.00185307	1.01403e-10	0	0	0.976543	0.613686	0.0182451	0.00744881	0.0115443	0.00191379	0.048377	0.0780816	LPP;LPP;LPP
3	cg14864167	-0.010964	0.00170812	1.37381e-10	-0.010964	0.00170812	1.37381e-10	0	0	0.0186752	0.990706	-0.00987708	0.00875728	-0.0110059	0.0017417	-0.0182957	0.141308	PDE7A
3	cg26845300	-0.00483024	0.000753791	1.47507e-10	0.00114764	0.00693967	0.86865	0.00902699	0.675517	6.16365	0.0458754	0.00895535	0.00605697	-0.00505306	0.000759723	0.0824306	0.0921086	SNX9
3	cg25997023	-0.00311788	0.000494557	2.89318e-10	-0.0010207	0.00289206	0.724139	0.00378114	0.68457	6.34055	0.0419921	0.00260116	0.00239027	-0.00336911	0.000505552	-0.0235842	0.0336964	FUT6;FUT6
3	cg06596013	-0.00624434	0.000993004	3.20896e-10	-0.00417762	0.0042048	0.320449	0.00471927	0.349706	3.07553	0.21486	0.00366917	0.00718863	-0.00642785	0.00100265	-0.128862	0.11483	SLC39A11;SLC39A11
3	cg11932113	-0.00671585	0.00107111	3.611e-10	-0.00628403	0.00271284	0.0205365	0.00265746	0	1.60487	0.448237	-0.0010889	0.00793406	-0.00680804	0.00108107	-0.110937	0.0996151	PLXNA4;PLXNA4;PLXNA4
3	cg24808809	0.011805	0.00189743	4.92157e-10	0.011805	0.00189743	4.92157e-10	0	0	1.11664	0.57217	0.00625059	0.00811795	0.0120849	0.00195217	0.0698231	0.0732166
3	cg19670885	-0.00190912	0.000310716	8.03345e-10	-0.00190912	0.000310716	8.03345e-10	0	0	0.146203	0.929507	-0.00256026	0.00179569	-0.00188846	0.000315521	-0.00377755	0.0182958	RGS12;RGS12
3	cg01524278	-0.0053777	0.000876502	8.49404e-10	-0.000924851	0.00538062	0.863527	0.00690553	0.631647	5.42958	0.0662188	0.00515814	0.00508323	-0.00571467	0.000889942	0.0504858	0.0561373
3	cg00095326	-0.00836771	0.00136787	9.51543e-10	-0.00836771	0.00136787	9.51543e-10	0	0	0.227578	0.892446	-0.0118997	0.00753477	-0.00824793	0.00139133	-0.00708675	0.0620253
3	cg12129848	-0.00477553	0.000782659	1.04966e-09	-0.00400702	0.00171921	0.019767	0.00189608	0.0276063	2.05678	0.357582	-0.0013522	0.00251283	-0.00514483	0.000824622	-0.00450914	0.0167773
3	cg01223189	0.00280451	0.000464984	1.62545e-09	0.00280451	0.000464984	1.62545e-09	0	0	1.3081	0.519935	0.00583238	0.00308976	0.00273742	0.000470372	-0.0206977	0.0410732	NSG1;NSG1;NSG1;NSG1
3	cg14646075	-0.0109331	0.00181705	1.77776e-09	-0.00869457	0.00771036	0.259469	0.0100372	0.754614	8.15044	0.0169885	0.0022188	0.00685161	-0.0117678	0.00188616	-0.104748	0.0454005	WDR69
3	cg22273589	0.00916164	0.00153024	2.13677e-09	0.00910226	0.00192291	2.2059e-06	0.00123412	0.268371	2.73363	0.254918	0.00789469	0.00717376	0.0092691	0.00156655	-0.131555	0.0856736	TSC22D1;TSC22D1;TSC22D1
3	cg17043230	-0.0155745	0.00260511	2.25295e-09	-0.0114282	0.00757573	0.131418	0.00849315	0.51067	4.08722	0.12956	-0.000163982	0.0117312	-0.0164439	0.00267223	0.215265	0.153698
3	cg17928268	-0.00584903	0.000979522	2.3535e-09	-0.00562181	0.0015101	0.000197013	0.00120832	0	1.16774	0.557735	5.75621e-05	0.00565429	-0.00602784	0.000994741	-0.0167771	0.0519825	CST11;CST11
3	cg17860800	-0.00724387	0.0012158	2.55177e-09	-0.00724387	0.0012158	2.55177e-09	0	0	0.692825	0.707221	-0.00188779	0.00656809	-0.00743291	0.00123728	-0.0139284	0.0997583	C1orf172
3	cg24628179	-0.00309717	0.000520452	2.66623e-09	-0.00176996	0.00233163	0.447788	0.00280996	0.562743	4.57397	0.101572	0.0018209	0.00292345	-0.00324789	0.000528961	-0.0483029	0.035058	FRMD4B
3	cg10674684	0.00227362	0.000382248	2.71384e-09	0.000942243	0.00198247	0.634582	0.00246799	0.471694	3.78569	0.150643	-0.001767	0.00216286	0.0024015	0.000388402	0.0138996	0.0268726
3	cg19906741	-0.00348519	0.000585961	2.71745e-09	-0.00348519	0.000585961	2.71745e-09	0	0	0.727125	0.695195	-0.00614598	0.00376379	-0.00341619	0.000593227	-0.0294419	0.0561333	PKHD1L1
3	cg22025816	0.00577808	0.000973921	2.97813e-09	-0.000395324	0.00674722	0.953278	0.00908088	0.795626	9.78599	0.00749891	-0.007039	0.0045238	0.00642028	0.000997443	-0.0642351	0.0603891	DNAJC4
3	cg04849850	-0.00388374	0.000657097	3.41154e-09	-0.00211426	0.00312937	0.499282	0.00358899	0.0354128	2.07343	0.354618	0.00310593	0.00494001	-0.00401087	0.00066302	0.00862747	0.0671763
3	cg21253427	0.00702868	0.00118995	3.49008e-09	0.00713722	0.00151396	2.42593e-06	0.00096269	0	1.09746	0.577682	0.015098	0.0081294	0.00684687	0.00120303	0.0323797	0.084813	SPATA5L1;SPATA5L1
3	cg02818409	-0.00319889	0.000542864	3.80122e-09	-0.00319889	0.000542864	3.80122e-09	0	0	0.693587	0.706951	-0.00272069	0.00373449	-0.00320383	0.000548731	-0.041061	0.0460124
3	cg25937884	-0.00444055	0.000754248	3.92348e-09	-0.0044566	0.00110893	5.84912e-05	0.000852976	0.37521	3.20108	0.201788	-0.00578375	0.00430467	-0.00442382	0.00076624	0.0661	0.0400434
3	cg24637364	0.00440212	0.000754616	5.42496e-09	0.00440212	0.000754616	5.42496e-09	0	0	0.737691	0.691532	0.00126588	0.00444112	0.00449056	0.000765819	0.0318916	0.0578678	PDE4B;PDE4B
3	cg09364020	0.00202675	0.000347785	5.62357e-09	0.00237063	0.0019429	0.222407	0.00256623	0	1.27198	0.529411	0.0024855	0.00147035	0.00199391	0.00035798	0.0285181	0.0245309
3	cg23902073	-0.00413109	0.000710073	5.96147e-09	-0.00413109	0.000710073	5.96147e-09	0	0	0.667143	0.716361	-0.00257256	0.00317581	-0.00422044	0.000728606	0.0257031	0.0465212	MRVI1;MRVI1;MRVI1;MRVI1;MRVI1
3	cg19638876	-0.00277193	0.000477271	6.32688e-09	-0.00197341	0.00149775	0.187642	0.00175941	0.326408	2.96916	0.226598	0.000323699	0.0019707	-0.00295711	0.000492089	-0.0138856	0.0185215
3	cg16209303	0.00172452	0.000297091	6.44827e-09	0.00172452	0.000297091	6.44827e-09	0	0	1.20206	0.548245	0.000287051	0.00171366	0.00177199	0.000301688	-0.0130507	0.0214681	CDC42BPB
3	cg16935914	-0.00840022	0.00145598	7.95203e-09	-0.00322869	0.00602742	0.592189	0.00779169	0.715202	7.02252	0.0298593	0.00154879	0.0055037	-0.00926111	0.00151095	0.0621162	0.0380746	MIR762HG;MIR762HG;MIR762HG;BCL7C
3	cg23673377	-0.0036473	0.000632258	7.98895e-09	-0.0036473	0.000632258	7.98895e-09	0	0	0.950929	0.621596	-0.0016901	0.00400651	-0.00369114	0.000640322	-0.0508452	0.0561084
3	cg07088882	-0.00522289	0.00090921	9.22314e-09	-0.00239817	0.00463516	0.604886	0.00539451	0.23549	2.61605	0.270353	0.00479072	0.00689723	-0.00540589	0.000917255	0.0616358	0.0976856
3	cg12728020	0.00938686	0.00163793	9.989e-09	0.00722392	0.00460076	0.116379	0.00502828	0	1.80075	0.406417	-0.000848743	0.00780532	0.00985916	0.00167534	0.00334394	0.150898
3	cg23868745	0.00295757	0.000517127	1.0701e-08	0.00238069	0.00142363	0.094472	0.00151487	0.0462781	2.09705	0.350455	-0.000536986	0.00272567	0.00308062	0.000526827	0.0177193	0.0233771	ZNF607;ZNF607
3	cg12741256	0.00531567	0.000934376	1.27777e-08	0.00469359	0.00236015	0.0467367	0.00245982	0.410129	3.39057	0.183547	0.000820809	0.00469544	0.00547836	0.000953555	0.103287	0.0626545	B4GALT6
3	cg15858036	-0.00785542	0.00138494	1.41109e-08	-0.00785542	0.00138494	1.41109e-08	0	0	0.926858	0.629123	-0.0117557	0.00612508	-0.00762264	0.00142212	-0.0522548	0.0631329	PPP1R1A
3	cg17953389	-0.00382888	0.000676372	1.50572e-08	0.023507	0.0295775	0.426753	0.0461094	0.779098	9.05379	0.0108142	0.00440645	0.00522811	-0.00399207	0.000682164	0.128091	0.0516826
3	cg23079227	0.00371382	0.00065619	1.51666e-08	0.0028669	0.00189914	0.131151	0.00202885	0	1.85439	0.395661	-0.000747296	0.00364221	0.00386893	0.000667179	-0.0208997	0.0449295
3	cg04338871	-0.00735983	0.00130508	1.70664e-08	0.00108581	0.0100356	0.913841	0.0131384	0.681243	6.27437	0.0434049	0.0124995	0.00829764	-0.00787164	0.00132159	0.0789257	0.137092	ANO1;ANO1
3	cg09639643	-0.00482875	0.000859637	1.94076e-08	-0.00325711	0.00323484	0.313989	0.00360551	0.0855955	2.18722	0.335006	0.00279316	0.00559229	-0.00500638	0.000870071	-0.036526	0.0590685
3	cg22736144	-0.00711512	0.0012793	2.6711e-08	-0.00711512	0.0012793	2.6711e-08	0	0	0.593688	0.74316	-0.00791937	0.00434958	-0.00707325	0.00133929	0.0220241	0.0389904	KIAA1026;KIAA1026;KIAA1026;KIAA1026;KIAA1026
3	cg09532889	-0.00819162	0.00148116	3.19248e-08	-0.00818086	0.00152243	7.71936e-08	0.000377058	0.263836	2.71679	0.257073	-0.00400534	0.00577565	-0.0084048	0.00153341	-0.0705513	0.042312
3	cg22973961	-0.00383743	0.000697651	3.78713e-08	-1.52653e-05	0.0048977	0.997513	0.0063132	0.5926	4.90918	0.0858982	0.00617135	0.00457123	-0.00407643	0.000706001	-0.00268571	0.0468153	EBF1;EBF1;EBF1
3	cg16136400	-0.00395086	0.000720723	4.21003e-08	-0.00171566	0.00306535	0.575687	0.00380624	0.452157	3.65068	0.161163	0.00229687	0.003458	-0.00424687	0.000737335	0.00629306	0.0215873	CEP85L
3	cg21362968	-0.00459995	0.000839159	4.21456e-08	-0.00259815	0.0032755	0.427657	0.00384332	0.311281	2.90394	0.234108	0.00218285	0.00450214	-0.00485083	0.000854175	0.0548602	0.0803281	ESAM;LOC101929340
3	cg05565510	-0.00441203	0.00080503	4.23951e-08	-0.00298855	0.00279225	0.284483	0.00318506	0.2602	2.70343	0.258795	0.00180474	0.00426678	-0.00463041	0.000819902	-0.0350881	0.0429723
3	cg21433495	0.00922699	0.0016836	4.24108e-08	0.00922699	0.0016836	4.24108e-08	0	0	0.981334	0.612218	0.00624555	0.00898174	0.00931749	0.00171409	0.150273	0.15136	MNDA;MNDA
3	cg07089217	-0.00273953	0.000502453	4.97206e-08	-0.00165581	0.00212046	0.434876	0.00239392	0.0480303	2.10091	0.349779	0.00218265	0.00355023	-0.00283728	0.000507619	-0.0154179	0.0336905

## Sheet: SM Table 3
SM Table 3: Overview of significantly enriched GO terms associated with meta-analysis DMPs (BH adjusted FDR < 0.05)
GO_ID	Description	Ontology	Overlapping Gene	P_value	Adjusted_P_value	Value	LogSize	Frequency	Uniqueness	Dispensability	disp_score	freq_score	uniq_score	composite_score	rank
GO:0000724	double-strand break repair via homologous recombination	BP	EPC2	0.000215	0.0069	-2.161339081356935	2.0863598306747484	0.676582	0.773297	0	1	0.840057	1	0.946686	1
GO:0000786	nucleosome	CC	EPC2	0.000215	0.0069	-2.161339081356935	2.012837224705172	0.537776	0.58649	0.165507	0.831646	0.962725	0.683049	0.825807	2
GO:0032993	protein-DNA complex	CC	EPC2	0.000215	0.0069	-2.161339081356935	2.3180633349627615	1.09137	0.696609	0	1	0.473493	0.869885	0.781126	3
GO:0000725	recombinational repair	BP	EPC2	0.000215	0.0069	-2.161339081356935	2.1072099696478683	0.710132	0.773297	0.84439	0.141086	0.810408	1	0.650498	4
GO:1902493	acetyltransferase complex	CC	EPC2	0.000215	0.0069	-2.161339081356935	2.0253058652647704	0.553593	0.411633	0.553772	0.436703	0.948747	0.386373	0.590608	5
GO:2000779	regulation of double-strand break repair	BP	EPC2	0.000215	0.0069	-2.161339081356935	2.155336037465062	0.794006	0.18391	0	1	0.736285	0	0.578762	6
GO:0000123	histone acetyltransferase complex	CC	EPC2	0.000215	0.0069	-2.161339081356935	1.9777236052888478	0.495598	0.210941	0.461874	0.530181	1	0.0458632	0.525348	7
GO:2000781	positive regulation of double-strand break repair	BP	EPC2	0.000215	0.0069	-2.161339081356935	1.9731278535996986	0.520018	0.200892	0.856899	0.128362	0.978419	0.0288141	0.378532	8
GO:0031248	protein acetyltransferase complex	CC	EPC2	0.000215	0.0069	-2.161339081356935	2.0211892990699383	0.548321	0.285512	0.983091	0	0.953406	0.172386	0.375264	9
GO:0000018	regulation of DNA recombination	BP	EPC2	0.000215	0.0069	-2.161339081356935	2.1583624920952498	0.799597	0.227989	0.777241	0.209391	0.731343	0.0747889	0.338508	10
GO:0045739	positive regulation of DNA repair	BP	EPC2	0.000215	0.0069	-2.161339081356935	2.1367205671564067	0.760456	0.185641	0.890422	0.0942625	0.765934	0.00293685	0.287711	11
GO:0006282	regulation of DNA repair	BP	EPC2	0.000215	0.0069	-2.161339081356935	2.3521825181113627	1.25252	0.20891	0.818287	0.167638	0.331081	0.042418	0.180379	12
GO:0051054	positive regulation of DNA metabolic process	BP	EPC2	0.000215	0.0069	-2.161339081356935	2.4653828514484184	1.62715	0.197816	0.776632	0.21001	0	0.0235946	0.0778683	13

## Sheet: SM Table 4
Overview of GO terms identified with Common Effects DMR genes (p < 0.05)
Molecular Function	Name	Value	LogSize	Frequency	Uniqueness	Dispensability	disp_score	freq_score	uniq_score	composite_score	rank
GO:0035255	ionotropic glutamate receptor binding	-2.0178	1.4624	0.153131	0.91821	0	1	0.79661	0.825299	0.87397	1
GO:0030160	synaptic receptor adaptor activity	-2.6494	0.69897	0.0218759	0.770709	0	1	1	0.493607	0.831202	2
GO:0035254	glutamate receptor binding	-1.74406	1.69897	0.267979	0.918112	0.366898	0.582145	0.618644	0.825078	0.675289	3
GO:0098919	structural constituent of postsynaptic density	-2.61795	0.69897	0.0218759	0.561925	0	1	1	0.0241057	0.674702	4
GO:0017124	SH3 domain binding	-1.35335	2.08991	0.667214	0.995898	0.00900773	0.989741	0	1	0.663247	5
GO:0098918	structural constituent of synapse	-2.04056	1.44716	0.147662	0.672951	0.5137	0.414954	0.805085	0.273774	0.497938	6
GO:0030159	signaling receptor complex adaptor activity	-1.69598	1.716	0.278917	0.752494	0.696715	0.206522	0.601695	0.452647	0.420288	7
GO:0035591	signaling adaptor activity	-1.49512	2.08636	0.661745	0.810342	0.402184	0.541958	0.00847458	0.582731	0.377721	8
GO:0098879	structural constituent of postsynaptic specialization	-2.56196	0.778151	0.0273448	0.558481	0.878052	0	0.991525	0.0163612	0.335962	9
GO:0099186	structural constituent of postsynapse	-2.21471	1.38021	0.125786	0.551205	0.861701	0.0186221	0.838983	0	0.285868	10
Biological Process	Name	Value	LogSize	Frequency	Uniqueness	Dispensability	disp_score	freq_score	uniq_score	composite_score	rank
GO:0035329	hippo signaling	-1.71751	1.34242	0.117423	0.977286	0.0260017	0.97265	0.907285	0.930786	0.936907	1
GO:0031146	SCF-dependent proteasomal ubiquitin-dependent protein catabolic process	-1.88584	1.66276	0.251622	1	0	1	0.748344	1	0.916115	2
GO:0051703	biological process involved in intraspecies interaction between organisms	-1.74954	1.74819	0.307537	1	0	1	0.682119	1	0.89404	3
GO:0035331	negative regulation of hippo signaling	-2.19103	1.38021	0.128607	0.894763	0	1	0.89404	0.679319	0.857786	4
GO:0031016	pancreas development	-1.56822	1.85126	0.391411	0.972766	0	1	0.582781	0.917011	0.833264	5
GO:0071625	vocalization behavior	-2.11745	1.32222	0.111832	0.812356	0	1	0.913907	0.428208	0.780705	6
GO:0043954	cellular component maintenance	-1.58225	1.82607	0.369045	0.938477	0.118161	0.875714	0.609272	0.812527	0.765838	7
GO:0035330	regulation of hippo signaling	-1.92825	1.62325	0.229255	0.916952	0.310465	0.673441	0.774834	0.746934	0.731736	8
GO:0060292	long-term synaptic depression	-1.90882	1.32222	0.111832	0.833827	0.349212	0.632685	0.913907	0.493634	0.680076	9
GO:0098880	maintenance of postsynaptic specialization structure	-2.40219	1.11394	0.0670991	0.671831	0	1	0.966887	0	0.655629	10
GO:0007584	response to nutrient	-1.34802	2.2014	0.883471	0.993741	0.0752229	0.920878	0	0.980928	0.633935	11
GO:0099175	regulation of postsynapse organization	-1.4316	2.17026	0.821964	0.944692	0.0304178	0.968005	0.0728477	0.831463	0.624105	12
GO:0050805	negative regulation of synaptic transmission	-1.68218	1.63347	0.234847	0.857342	0.543868	0.427938	0.768212	0.56529	0.587147	13
GO:0030326	embryonic limb morphogenesis	-1.34539	2.09342	0.687766	0.858651	0.164534	0.826937	0.231788	0.569279	0.542668	14
GO:0035176	social behavior	-1.76162	1.74819	0.307537	0.79947	0.51347	0.459912	0.682119	0.388943	0.510325	15
GO:0060291	long-term synaptic potentiation	-1.47484	1.70757	0.27958	0.838012	0.696201	0.267709	0.715232	0.506389	0.496444	16
GO:0008344	adult locomotory behavior	-1.5499	1.92942	0.469694	0.793744	0.579586	0.390369	0.490066	0.371495	0.41731	17
GO:0099084	postsynaptic specialization organization	-1.77468	1.51851	0.178931	0.729172	0.734323	0.227611	0.834437	0.174729	0.412259	18
GO:0008306	associative learning	-1.50802	1.95904	0.503243	0.792796	0.606381	0.362186	0.450331	0.368604	0.393707	19
GO:0099562	maintenance of postsynaptic density structure	-2.58865	0.90309	0.0391411	0.680917	0.856098	0.0995228	1	0.0276875	0.375737	20
GO:0099558	maintenance of synapse structure	-1.96244	1.4624	0.156565	0.701046	0.8548	0.100889	0.860927	0.0890228	0.35028	21
GO:0097106	postsynaptic density organization	-1.82676	1.44716	0.150973	0.705347	0.914989	0.037579	0.86755	0.10213	0.335753	22
GO:0034331	cell junction maintenance	-1.74463	1.69897	0.273988	0.708893	0.90318	0.050001	0.721854	0.112935	0.29493	23
GO:0035113	embryonic appendage morphogenesis	-1.34539	2.09342	0.687766	0.858651	0.950716	0	0.231788	0.569279	0.267022	24
GO:0030534	adult behavior	-1.31865	2.18184	0.84433	0.785578	0.641709	0.325026	0.0463576	0.34661	0.239331	25
Cellular Component	Name	Value	LogSize	Frequency	Uniqueness	Dispensability	disp_score	freq_score	uniq_score	composite_score	rank
GO:0098686	hippocampal mossy fiber to CA3 synapse	-1.78132	1.6902	0.253071	0.959147	8.79e-06	0.99999	0.973501	0.0888766	0.687456	1
GO:0001917	photoreceptor inner segment	-1.6779	1.85733	0.374334	0.999979	1.049e-05	0.999989	0.957462	0.0967955	0.684749	2
GO:0019005	SCF ubiquitin ligase complex	-1.74139	1.82607	0.347973	0.919379	0	1	0.960948	0.0811643	0.680704	3
GO:0005883	neurofilament	-2.46256	1.04139	0.0527232	0.706848	0	1	1	0.0399467	0.679982	4
GO:0031526	brush border membrane	-1.7698	1.78533	0.316339	0.716345	1.014e-05	0.999989	0.965132	0.0417885	0.66897	5
GO:0099512	supramolecular fiber	99512	-1.53698	3.02776	5.61502	0.65109	0.291816	0.606503	0.99182	0.630046	6
GO:0099081	supramolecular polymer	99081	-1.53131	3.031	5.65719	0.68064	0.259674	0.606074	1	0.621916	7
GO:0048786	presynaptic active zone	-1.50771	1.95424	0.469236	0.959146	0.391972	0.573655	0.944909	0.0888764	0.535814	8
GO:0097731	9+0 non-motile cilium	-1.43688	2.12385	0.695946	0.667739	0.344664	0.625112	0.914923	0.0323619	0.524133	9
GO:0045111	intermediate filament cytoskeleton	-1.37295	2.4133	1.36026	0.834561	0.300528	0.673118	0.827057	0.0647149	0.52163	10
GO:0097730	non-motile cilium	-1.34618	2.233	0.896294	0.718914	0.630054	0.314697	0.888424	0.0422868	0.415136	11
GO:0060170	ciliary membrane	-1.66983	1.89763	0.411241	0.701523	0.691928	0.247397	0.95258	0.038914	0.412964	12
GO:0005884	actin filament	-1.40903	2.08279	0.632678	0.665092	0.662404	0.279509	0.923291	0.0318487	0.41155	13
GO:0005882	intermediate filament	5882	-1.53102	2.3483	1.17045	0.629327	0.315487	0.696372	0.129857	0.380572	14
GO:0099080	supramolecular complex	-1.3018	3.15987	7.61322	0.999971	1.457e-05	0.999984	0	0.0967939	0.365593	15
GO:0097733	photoreceptor cell cilium	97733	-1.47454	2.08279	0.632678	0.665438	0.27621	0.731491	0.0255624	0.344421	16
GO:0001750	photoreceptor outer segment	1750	-1.57303	1.98227	0.50087	0.670362	0.270854	0.744786	0	0.338546	17
GO:0099513	polymeric cytoskeletal fiber	-1.81023	2.91328	4.31275	0.611431	0.508448	0.446966	0.436541	0.0214419	0.30165	18
GO:0031461	cullin-RING ubiquitin ligase complex	31461	-1.34341	2.28103	1.00174	0.919379	0	0.705269	0.097137	0.267469	19
GO:0005903	brush border	5903	-1.46571	2.03743	0.56941	0.912187	0.00782269	0.73749	0.0132924	0.252869	20

## Sheet: SM Table 5
Overview of DMPs associated with the Specific Effects of Olanzapine (nominal p.value < 0.05 and Δmethylation > 2%)
CpGs	logFC	AveExpr	Abs_meth_diff	t	P.Value	B	gene
cg16361921	-0.144937	0.46756	0.0955813	-4.5954	6.86511e-06	1.05162
cg06174215	-0.0341815	0.779983	0.0234144	-4.45353	1.27571e-05	0.456167	PAPD7;PAPD7;PAPD7
cg10857441	-0.0510906	0.739248	0.0347936	-4.25756	2.92907e-05	-0.340087	POLS
cg04638710	-0.0358828	0.569676	0.0245653	-3.69157	0.000273776	-2.46325
cg26905254	0.0692055	0.385939	0.0491388	3.65168	0.000317457	-2.60273
cg19767709	0.0355308	0.329393	0.0249338	3.64055	0.000330767	-2.6414	FBXO27
cg24349631	-0.0344418	0.23644	0.0235905	-3.63223	0.000341071	-2.67027	C22orf26;LOC150381
cg25551243	-0.0383686	0.855216	0.0262446	-3.59106	0.000396585	-2.81209	SOX30;SOX30
cg10138430	-0.0376684	0.437925	0.0257718	-3.42125	0.000728275	-3.3817	ALOX5AP;ALOX5AP
cg14799392	-0.0521732	0.480281	0.0355176	-3.37767	0.000848036	-3.52384	ALOX5AP;ALOX5AP
cg07464716	-0.0375621	0.834989	0.0257	-3.31715	0.001045	-3.71846	SOX30;SOX30
cg00182405	0.0292006	0.433789	0.0204465	3.27631	0.00120117	-3.84798	LOC101928847;NCAM1;NCAM1;NCAM1;NCAM1;NCAM1
cg04627621	-0.0637955	0.563074	0.0432562	-3.25594	0.0012869	-3.91202
cg00632811	-0.0524205	0.382348	0.0356829	-3.21751	0.00146435	-4.03186	PWP1
cg16619576	0.0350576	0.67871	0.0245977	3.20687	0.00151734	-4.06481
cg25345738	-0.0572493	0.485405	0.0389052	-3.20355	0.00153424	-4.07507	PWP1
cg20899978	0.0286804	0.143287	0.0200786	3.18608	0.00162603	-4.12888
cg14223654	0.030327	0.505515	0.0212435	3.1797	0.00166084	-4.14849
cg25600478	-0.0405016	0.240544	0.0276831	-3.17705	0.00167549	-4.15661
cg07075347	-0.0449826	0.401278	0.0306985	-3.14334	0.00187254	-4.25943	PGAM2
cg15768040	-0.0336448	0.648546	0.023051	-3.13782	0.00190677	-4.27617	PTCH1;PTCH1;PTCH1;PTCH1;PTCH1;PTCH1;PTCH1;PTCH1;PTCH1;PTCH1;PTCH1;PTCH1;PTCH1;PTCH1
cg14583312	0.064696	0.258839	0.0458646	3.10669	0.00211091	-4.37006	PDXK
cg03240727	0.0323851	0.676278	0.0227015	3.0981	0.00217075	-4.39584	TOMM5;TOMM5;TOMM5
cg20201270	0.0490436	0.451124	0.0345788	3.07044	0.00237399	-4.47832
cg11945167	0.030653	0.291266	0.0214744	3.05426	0.00250092	-4.52627	CSMD1
cg06119452	-0.0303936	0.341713	0.0208469	-3.04888	0.0025445	-4.54217	THBS2
cg13682187	-0.0343234	0.48803	0.0235104	-3.03526	0.00265788	-4.58226	CFHR5
cg13587180	-0.0312052	0.757293	0.0213976	-2.97985	0.00316887	-4.7437	SHISA3
cg08404221	0.0314403	0.489031	0.022032	2.94494	0.00353546	-4.84398	FBXO27
cg08461876	0.0349639	0.795132	0.0245312	2.93517	0.00364488	-4.87187
cg24593918	0.0605025	0.255642	0.0428289	2.91352	0.00389826	-4.93331	HLA-DQB1
cg07143586	-0.0315821	0.451354	0.0216532	-2.91328	0.00390115	-4.93399	BFSP2
cg26658509	0.0568732	0.732091	0.0402088	2.88003	0.00432216	-5.02754
cg00084338	-0.0526861	0.60545	0.0358604	-2.86954	0.00446322	-5.05682	DLL1
cg21042336	-0.0384363	0.657555	0.0262902	-2.86923	0.00446755	-5.0577	OSBPL1A
cg02251754	0.0297246	0.70463	0.0208173	2.85588	0.00465335	-5.09483
cg21727992	0.0313624	0.76344	0.0219768	2.85586	0.00465366	-5.09489	IGSF21
cg05542785	-0.0291896	0.271036	0.0200294	-2.83003	0.00503343	-5.16629
cg16810626	-0.029718	0.335097	0.0203882	-2.82953	0.00504113	-5.16768	GATA4
cg19677326	0.0318721	0.574147	0.0223379	2.80955	0.00535451	-5.22249
cg14304326	-0.0366568	0.478014	0.0250885	-2.79399	0.00561062	-5.26491	BRD7;BRD7
cg01152624	-0.030612	0.436863	0.0209951	-2.77215	0.00598887	-5.32408
cg06153448	-0.0307541	0.603145	0.0210915	-2.76081	0.00619432	-5.35464
cg27057600	-0.0336463	0.573778	0.023052	-2.7478	0.00643782	-5.38955	CD86;CD86;CD86;CD86;CD86
cg25606039	0.0313736	0.492532	0.0219847	2.74513	0.00648899	-5.39671
cg00908766	-0.036905	0.619186	0.0252562	-2.74329	0.00652424	-5.40161	CELSR2
cg02310723	0.0402245	0.682721	0.0282738	2.74135	0.00656172	-5.4068
cg15755490	0.036113	0.661711	0.0253475	2.73154	0.00675444	-5.43297
cg16006004	-0.0291803	0.662373	0.020023	-2.71085	0.00717743	-5.48785	BRCA1;NBR2;BRCA1;BRCA1;BRCA1;BRCA1
cg25064860	-0.0348686	0.564397	0.0238793	-2.70774	0.00724309	-5.49607
cg21656205	0.0311218	0.355391	0.0218063	2.70537	0.00729337	-5.50232	RIMS4
cg02771260	0.0403276	0.591627	0.0283473	2.69868	0.00743727	-5.51995	MS4A3;MS4A3;MS4A3
cg25399239	-0.0511632	0.324943	0.0348421	-2.69596	0.00749656	-5.52711
cg03573137	-0.0293398	0.702428	0.0201314	-2.68921	0.00764537	-5.54484	TECTA
cg09352925	0.0909187	0.720592	0.0650482	2.68763	0.00768056	-5.54898
cg13538554	-0.0374017	0.849751	0.0255917	-2.67307	0.00801218	-5.58707	TMEM260
cg08471713	0.0467174	0.257954	0.0329121	2.66693	0.00815573	-5.60306	MEOX1;MEOX1;MEOX1
cg19763428	0.0337236	0.283473	0.0236508	2.63848	0.00885218	-5.67677	PDE1C
cg26476930	0.0462936	0.70593	0.0326086	2.61929	0.00935146	-5.72604
cg08280036	0.0399876	0.719878	0.028105	2.61019	0.00959697	-5.74929
cg07469075	-0.0561998	0.631295	0.0382057	-2.59222	0.0100989	-5.79498	PAMR1;PAMR1;PAMR1;PAMR1
cg18782210	-0.0420223	0.586679	0.0287075	-2.58101	0.0104237	-5.82333	PAMR1;PAMR1;PAMR1;PAMR1
cg14614789	-0.0577444	0.193069	0.0392349	-2.56613	0.0108694	-5.86077
cg23201527	0.0314372	0.653164	0.0220298	2.5601	0.0110548	-5.87589
cg08723959	0.0320354	0.652234	0.0224536	2.55258	0.0112898	-5.89468
cg25716691	0.0458183	0.37435	0.0322685	2.5515	0.0113239	-5.89738
cg12227166	-0.0314794	0.493048	0.0215835	-2.54865	0.0114144	-5.90449
cg08270491	0.0317934	0.738585	0.0222821	2.548	0.0114353	-5.90612	KIAA0196
cg04714233	0.0297306	0.520423	0.0208215	2.52177	0.0123007	-5.9712	LOC100506606;FAR2;FAR2;FAR2
cg08196561	-0.0307213	0.554376	0.0210693	-2.50667	0.012825	-6.00837	ZCCHC14
cg20302533	0.0384181	0.193905	0.0269871	2.50171	0.0130012	-6.02051	POU6F2;POU6F2
cg04349084	-0.0295018	0.136639	0.0202414	-2.48018	0.0137926	-6.07304
cg11782634	-0.0304047	0.374669	0.0208544	-2.47608	0.0139482	-6.08301	ESPNP
cg05155812	0.053759	0.754391	0.0379659	2.47252	0.0140843	-6.09163	SUN1;SUN1;SUN1;SUN1
cg27246129	-0.0309573	0.508572	0.0212294	-2.46697	0.0142991	-6.10507	DLL1
cg07001450	0.0415959	0.660084	0.0292518	2.45828	0.0146413	-6.12604	SELL;SELL
cg16387151	-0.0298731	0.162095	0.0204936	-2.44681	0.0151039	-6.15362
cg14240646	0.0571412	0.441255	0.0404021	2.44326	0.0152499	-6.16213	ACBD5;ACBD5
cg01267068	0.0291106	0.803604	0.0203829	2.42167	0.0161638	-6.21364
cg05107650	-0.0407818	0.190126	0.027872	-2.4068	0.0168207	-6.24883	ZBTB38
cg01907094	0.032067	0.360544	0.022476	2.39764	0.0172374	-6.27043	SELL;SELL
cg10066698	-0.0302424	0.175457	0.0207442	-2.39509	0.0173549	-6.27643
cg06316758	0.0758249	0.679374	0.0539635	2.38748	0.0177101	-6.29429
cg03803658	-0.0306408	0.560077	0.0210147	-2.3828	0.0179316	-6.30524
cg19287610	-0.0340677	0.738742	0.0233373	-2.3789	0.0181181	-6.31436
cg17035276	0.0339711	0.782284	0.0238264	2.3773	0.0181949	-6.31809
cg00811436	0.0296681	0.378454	0.0207772	2.36876	0.0186107	-6.33798
cg18976044	-0.0403696	0.465266	0.0275942	-2.36451	0.0188208	-6.34786
cg18014931	-0.0394286	0.783937	0.0269597	-2.36326	0.0188829	-6.35076	SV2C;SV2C
cg06864789	-0.0802232	0.499706	0.0540887	-2.34708	0.019704	-6.38818
cg20269954	-0.0510208	0.500635	0.0347469	-2.34524	0.0197998	-6.39244
cg25602718	0.0316679	0.807833	0.0221932	2.342	0.0199687	-6.3999
cg01093476	-0.0336455	0.22614	0.0230514	-2.3352	0.020327	-6.41551	PDZD2
cg16246284	0.0296272	0.319733	0.0207483	2.33239	0.0204767	-6.42195	PRSS3;PRSS3
cg07899896	-0.03221	0.510007	0.0220789	-2.33021	0.0205938	-6.42695	FAM13C;FAM13C;FAM13C;FAM13C
cg02500748	-0.0404454	0.540534	0.0276453	-2.32761	0.020734	-6.4329
cg12420107	0.0340549	0.351371	0.0238858	2.3162	0.0213588	-6.45892	VTRNA1-1
cg08422420	0.0356156	0.0992445	0.0249941	2.3124	0.0215709	-6.46757	SDHAP3
cg23336892	0.0388333	0.286787	0.0272827	2.28766	0.0229956	-6.52352
cg14418922	-0.0296473	0.788892	0.0203402	-2.27204	0.0239362	-6.55852
cg18523915	0.0455095	0.470934	0.0320476	2.27173	0.0239552	-6.55921
cg14372705	0.0311503	0.562883	0.0218265	2.26826	0.024169	-6.56696
cg13159023	0.0456318	0.291142	0.0321351	2.25514	0.0249921	-6.59615	PDXK
cg15933560	0.0522373	0.606924	0.0368716	2.25146	0.0252278	-6.60432
cg13388618	0.0662587	0.533687	0.046998	2.25109	0.0252517	-6.60514	RAMP1;RAMP1
cg18060330	0.0323088	0.832343	0.0226474	2.24957	0.0253489	-6.60849	BTNL2
cg23464743	0.0409556	0.247875	0.0287951	2.24852	0.0254169	-6.61082	HLA-DQB1
cg06627617	0.0379105	0.507816	0.0266259	2.24016	0.0259624	-6.62929	ASAP2;ASAP2
cg14222729	0.043865	0.664501	0.0308718	2.23261	0.026463	-6.6459
cg01191262	0.0301398	0.480351	0.0211111	2.22924	0.0266897	-6.65331	SYT1;SYT1;SYT1;SYT1
cg26893861	-0.0527157	0.299143	0.0358802	-2.22015	0.0273086	-6.67322	DUSP3
cg20837403	-0.0323856	0.511326	0.0221979	-2.21591	0.0276013	-6.68247	FLJ33360
cg26967960	-0.0296751	0.468932	0.0203591	-2.21034	0.0279901	-6.6946	CAV3;CAV3
cg18678645	0.0520385	0.386718	0.0367287	2.20273	0.0285294	-6.71114	MIR886
cg10666140	0.0333071	0.751481	0.0233553	2.20092	0.0286587	-6.71506	SUN1;SUN1;SUN1;SUN1
cg13422161	-0.0334576	0.287025	0.0229242	-2.18699	0.0296725	-6.74515	KRT84
cg05841700	0.0653464	0.330659	0.0463361	2.18592	0.0297523	-6.74748	PM20D1
cg09226051	0.0410766	0.429419	0.0288814	2.18539	0.0297916	-6.74862	NLRP3;NLRP3;NLRP3;NLRP3;NLRP3
cg02920129	0.0308215	0.418013	0.0215937	2.18483	0.0298329	-6.74982	ZNF385D
cg17499156	-0.0348254	0.592168	0.0238501	-2.18179	0.0300593	-6.75635
cg00378211	-0.0309001	0.401963	0.0211906	-2.1817	0.0300661	-6.75655
cg21167402	0.0316509	0.131382	0.0221812	2.17257	0.0307549	-6.77612	SDHAP3
cg05043910	-0.0303229	0.721597	0.0207989	-2.1641	0.0314067	-6.79423	LYG2
cg01741372	-0.044224	0.643639	0.0301887	-2.1589	0.0318124	-6.8053
cg23785275	0.0385183	0.672003	0.0270584	2.15795	0.0318871	-6.80732	HLA-DQB2
cg01359822	-0.0358619	0.626576	0.0245512	-2.15469	0.0321439	-6.81424	ETS2
cg20057198	0.0542418	0.745578	0.0383133	2.14722	0.0327406	-6.83009
cg12859507	-0.0431222	0.540096	0.0294477	-2.1449	0.0329275	-6.83499	CACNA2D4
cg04481923	0.0557605	0.42737	0.0394069	2.11685	0.0352631	-6.89391	MIR886
cg24833027	-0.0293204	0.579758	0.0201182	-2.11649	0.0352944	-6.89467	ARHGEF10
cg02978505	0.0310428	0.419824	0.0217504	2.11571	0.0353614	-6.8963
cg25752492	0.0291396	0.755839	0.0204034	2.11085	0.0357815	-6.90644
cg01351857	0.0315683	0.300085	0.0221227	2.10949	0.0358997	-6.90927
cg08642068	-0.0349816	0.658289	0.0239558	-2.10543	0.0362547	-6.91771	SPAG4L
cg09147516	-0.0339597	0.536436	0.0232642	-2.09747	0.0369596	-6.93421
cg18946787	0.0288613	0.771075	0.0202066	2.09194	0.0374556	-6.94562
cg05747963	-0.036058	0.591711	0.0246837	-2.08165	0.0383951	-6.96682	ARHGEF18
cg12242038	-0.0420433	0.293875	0.0287217	-2.07769	0.0387618	-6.97495
cg09314196	0.0422896	0.324283	0.0297468	2.07659	0.0388641	-6.9772	ZNF492
cg00122614	-0.0472303	0.551484	0.0322075	-2.06839	0.0396346	-6.99397
cg01609658	-0.0471373	0.197089	0.0321451	-2.06142	0.0402995	-7.00816	RIIAD1
cg14181112	-0.0607207	0.663469	0.041215	-2.05193	0.0412209	-7.02744	POLE
cg08423857	0.0299007	0.625274	0.0209418	2.05062	0.0413494	-7.03009
cg11965913	0.0641987	0.342376	0.0455041	2.04536	0.0418688	-7.04072	PM20D1
cg05825244	-0.0380291	0.416192	0.0260154	-2.0367	0.0427371	-7.05819	EBF4
cg16759545	0.0336721	0.542618	0.0236142	2.03487	0.0429223	-7.06186	F13A1
cg15451504	0.0322516	0.28871	0.0226068	2.02738	0.0436876	-7.07688
cg24399712	-0.0293367	0.133102	0.0201293	-2.02212	0.0442322	-7.08741
cg12058843	0.0296738	0.675704	0.0207813	2.005	0.0460438	-7.12145
cg27149073	0.0302448	0.149101	0.0211854	2.00406	0.0461457	-7.12332	SDHAP3
cg19399219	0.0287061	0.725927	0.0200969	2.00121	0.0464536	-7.12895
cg19142026	-0.0350809	0.363082	0.024023	-1.99401	0.0472403	-7.14317	HOXA4;HOXA4
cg24464516	-0.0366883	0.788538	0.0251098	-1.99147	0.0475205	-7.14817	TRIM66
cg15229836	-0.0500029	0.578653	0.0340656	-1.9866	0.0480611	-7.15773
cg26844603	-0.0309774	0.556727	0.021243	-1.98195	0.0485827	-7.16685	TMEM87B
cg18797653	0.0416132	0.433166	0.0292641	1.97926	0.0488872	-7.17213	MIR886
cg07931809	0.04713	0.53021	0.0332075	1.97921	0.0488921	-7.17221

## Sheet: SM Table 6
Overview of DMPs associated with the Specific Effects of Quetiapine (nominal p.value < 0.05 and Δmethylation > 3%)
CpGs	logFC	AveExpr	Abs_meth_diff	t	P.Value	B	gene
cg06108461	0.0545903	0.834449	0.0385641	5.17372	4.71946e-07	4.10605	TAF4
cg21145980	0.0506037	0.505073	0.0356982	4.96894	1.25164e-06	3.16121
cg04027736	0.04732	0.638868	0.0333436	4.22128	3.40548e-05	-0.0163327	HOXA2
cg19084031	0.0685292	0.0980558	0.048647	4.11013	5.36984e-05	-0.450822
cg19432993	0.0464285	0.627698	0.0327052	4.0161	7.83521e-05	-0.81046	HOXA2
cg24733560	-0.048496	0.793485	0.0330561	-3.96729	9.50737e-05	-0.994273	TAF4
cg09168501	-0.0729542	0.866735	0.0493107	-3.81118	0.000174308	-1.56879	METTL11B
cg21250689	0.0499565	0.646592	0.0352337	3.77867	0.000197283	-1.68584
cg25288034	-0.0617298	0.621993	0.0418854	-3.67413	0.000292124	-2.05621
cg02225599	0.0557107	0.252213	0.039371	3.66617	0.000300881	-2.08404	HOXA2
cg06401979	0.0451949	0.517189	0.0318226	3.65782	0.00031033	-2.11315	HOXA2
cg06166490	0.0427306	0.681049	0.0300616	3.59274	0.000394164	-2.3381	HOXA2
cg10962762	-0.0744233	0.465547	0.0502783	-3.50341	0.000544302	-2.64093
cg13092405	-0.0720786	0.386351	0.0487336	-3.38087	0.000838646	-3.04508
cg06330132	-0.0504643	0.881529	0.0343745	-3.35877	0.000905474	-3.11657	ZC3H7B
cg02224314	-0.0687198	0.750039	0.0465163	-3.34089	0.000963122	-3.17408	BCL11B;BCL11B
cg25521234	0.0437205	0.178108	0.0307686	3.28695	0.00115852	-3.34596
cg23246911	-0.108964	0.40946	0.0727466	-3.24717	0.00132552	-3.47102	RPH3AL
cg04316580	-0.048916	0.751922	0.0333376	-3.21639	0.00146983	-3.56685	KLHL31
cg20232307	0.0553871	0.525747	0.0391379	3.12009	0.00202067	-3.86122	LCE3E
cg12454873	0.0476574	0.609156	0.0335852	3.09824	0.00216972	-3.92687
cg00128506	-0.0703153	0.320504	0.0475702	-3.09541	0.00218977	-3.93535
cg08835041	0.0751378	0.796383	0.0534616	3.0856	0.00226051	-3.96465
cg21520684	-0.0574951	0.346192	0.0390689	-3.0627	0.00243395	-4.03273
cg11229663	0.0608737	0.71277	0.0430973	3.06146	0.00244369	-4.03641	PRKG1;PRKG1
cg25210835	0.0913889	0.25925	0.0653953	3.05741	0.0024757	-4.04838	GSTM5
cg14470047	-0.0463926	0.764372	0.0316454	-3.02073	0.00278399	-4.15628	GPRIN1
cg16201336	0.0533066	0.385875	0.0376404	3.01597	0.00282644	-4.17018
cg16423305	0.0471962	0.589688	0.0332549	2.98673	0.00310079	-4.25519
cg16572876	-0.0702264	0.439858	0.0475115	-2.97983	0.00316901	-4.27514
cg13221347	-0.0630773	0.562471	0.0427798	-2.97688	0.00319862	-4.28367	STK32C
cg16763089	-0.0639531	0.252594	0.0433607	-2.97122	0.00325612	-4.3	LOC149837
cg09976142	0.0845325	0.433496	0.0603441	2.9485	0.00349643	-4.3652	CIZ1;CIZ1
cg11804239	0.043905	0.391346	0.0309005	2.90251	0.00403323	-4.49576
cg19432846	0.0879084	0.524257	0.0628282	2.89046	0.00418577	-4.52964
cg21235746	-0.0477274	0.323524	0.0325409	-2.86654	0.00450442	-4.59653	LOC149837
cg20295248	-0.0566628	0.251727	0.0385144	-2.85543	0.00465982	-4.62742	LOC149837
cg24447866	-0.0668312	0.452602	0.0452673	-2.82389	0.00512788	-4.7145
cg10440639	-0.0791126	0.353081	0.0533603	-2.79302	0.0056269	-4.79884	RPH3AL
cg24467349	0.085159	0.27247	0.0608047	2.78017	0.00584734	-4.83369	GSTM5
cg01283420	0.0436107	0.606789	0.0306902	2.77215	0.00598901	-4.85539	SARDH;SARDH
cg02217269	0.0749518	0.222995	0.0533258	2.76917	0.00604226	-4.86341
cg11234688	0.0504695	0.535744	0.0356019	2.76757	0.00607108	-4.86772
cg26312807	-0.046787	0.413125	0.0319101	-2.75473	0.00630704	-4.90225
cg21547364	0.0458637	0.752454	0.032301	2.74945	0.00640645	-4.9164
cg02810829	0.0588397	0.658168	0.0416277	2.74533	0.00648505	-4.92744
cg13033202	0.0569774	0.117957	0.040284	2.727	0.00684534	-4.97632	PTPN14
cg24272454	-0.0468706	0.503193	0.0319662	-2.72441	0.00689759	-4.9832	PCDHGA12;PCDHGA12;PCDHGA8;PCDHGB5;PCDHGA9;PCDHGB6;PCDHGA10;PCDHGB7;PCDHGA11;PCDHGA11;PCDHGA1;PCDHGA2;PCDHGA3;PCDHGB1;PCDHGA4;PCDHGB2;PCDHGA5;PCDHGB3;PCDHGA6;PCDHGA7;PCDHGB4
cg13152974	0.0592084	0.539414	0.0418939	2.71967	0.00699419	-4.99576
cg11294950	0.180357	0.589774	0.133165	2.71488	0.00709322	-5.00846
cg26964426	-0.0443327	0.814633	0.0302617	-2.71286	0.00713537	-5.01381
cg11104088	-0.0492991	0.300503	0.0335943	-2.70738	0.00725074	-5.02828	TAF3
cg16915863	0.0442903	0.819444	0.0311758	2.69294	0.00756276	-5.06629	LOC400043
cg14764203	-0.128372	0.673262	0.0851366	-2.67569	0.0079515	-5.11146
cg08985785	-0.0455725	0.492304	0.0310948	-2.66864	0.00811561	-5.12986	KCNK5
cg19568997	-0.0551639	0.730662	0.0375149	-2.663	0.00824897	-5.14453	PARD3
cg10831901	-0.04807	0.226343	0.0327706	-2.6584	0.00835917	-5.15647	LOC149837
cg24609819	0.0601358	0.635686	0.0425639	2.65723	0.00838738	-5.1595	PRKG1;PRKG1
cg00835279	-0.0526755	0.32859	0.0358533	-2.64679	0.00864344	-5.18654	COLEC11;COLEC11;COLEC11;COLEC11
cg19034770	-0.0614229	0.318202	0.0416815	-2.64514	0.00868447	-5.1908
cg17152205	-0.0806652	0.286594	0.0543785	-2.62492	0.00920244	-5.24284
cg07986251	-0.0463568	0.645264	0.0316213	-2.60752	0.00967003	-5.2873	OXR1;OXR1;OXR1
cg21147238	0.0466475	0.585675	0.032862	2.59196	0.0101061	-5.32682	LOC101927526
cg00106345	0.0470953	0.456383	0.0331826	2.58876	0.0101981	-5.33493
cg06657917	-0.0594	0.84887	0.0403369	-2.57601	0.0105715	-5.36711	HCN2
cg23272287	0.0550253	0.419186	0.0388773	2.57398	0.010632	-5.37222	FAM13C;FAM13C;FAM13C;FAM13C
cg07520269	-0.0449387	0.410928	0.030669	-2.56089	0.0110303	-5.4051	DLG2;DLG2;DLG2
cg20084219	-0.0535947	0.713009	0.0364675	-2.56012	0.011054	-5.40701	C17orf98
cg09826759	-0.0547603	0.801873	0.0372456	-2.5592	0.0110826	-5.40932
cg01326874	0.133748	0.444396	0.0971403	2.55751	0.011135	-5.41354	ZNF714;ZNF714;ZNF714;ZNF714;ZNF714
cg02291164	0.0792155	0.38686	0.0564434	2.54744	0.0114531	-5.43869
cg22702243	0.0583386	0.557094	0.041266	2.54324	0.0115881	-5.44915	GNE;GNE
cg04547000	-0.095729	0.607343	0.0642008	-2.53954	0.0117082	-5.45835
cg09978860	-0.0684212	0.37578	0.0463189	-2.5381	0.0117551	-5.46192
cg13031492	0.0467463	0.461301	0.0329327	2.53326	0.0119147	-5.47394	WASH2P
cg06061257	0.0457737	0.787886	0.0322366	2.53007	0.0120206	-5.48184	SDK2
cg23118773	-0.0595486	0.505157	0.0404357	-2.52671	0.0121334	-5.49016	ABCG2
cg17842918	0.0476696	0.36514	0.033594	2.52127	0.0123175	-5.50358	ATP11A;ATP11A
cg16524778	-0.0579529	0.296921	0.0393738	-2.52048	0.0123446	-5.50554
cg22233843	-0.0734001	0.223372	0.0496045	-2.51644	0.0124835	-5.5155	HLA-DQB1
cg11789449	-0.0848113	0.639554	0.0570922	-2.49361	0.0132942	-5.57149	KCNJ10
cg07464716	0.0455597	0.834989	0.0320835	2.49315	0.0133108	-5.5726	SOX30;SOX30
cg17566946	0.0570284	0.13114	0.0403207	2.48307	0.0136841	-5.59718
cg19413350	-0.047378	0.853699	0.0323066	-2.48033	0.0137871	-5.60384
cg16927164	-0.0548219	0.484476	0.0372867	-2.4769	0.013917	-5.61217
cg05536782	-0.0451029	0.469833	0.0307793	-2.47464	0.014003	-5.61764	COLEC11;COLEC11;COLEC11;COLEC11;COLEC11;COLEC11;COLEC11;COLEC11;COLEC11;COLEC11;COLEC11
cg08029165	-0.0489297	0.324134	0.0333468	-2.4742	0.0140199	-5.61871
cg22742992	0.044196	0.396986	0.0311084	2.46825	0.0142493	-5.63311	INPP4A;INPP4A;INPP4A;INPP4A
cg16769623	-0.0580438	0.473999	0.0394343	-2.46729	0.0142866	-5.63543
cg11940040	-0.0676993	0.331823	0.0458416	-2.46116	0.0145272	-5.65024	RPH3AL
cg00435273	-0.0844581	0.276737	0.0568613	-2.45954	0.0145911	-5.65414	C2orf76
cg12944343	-0.0467934	0.46708	0.0319143	-2.45784	0.0146586	-5.65823
cg26905254	-0.0752971	0.385939	0.0508534	-2.45	0.0149741	-5.6771
cg05376982	0.0643702	0.411288	0.0456284	2.42607	0.0159736	-5.73429	GSTM5
cg09466719	0.0529056	0.634484	0.0373521	2.42437	0.0160469	-5.73834	GNE;GNE
cg10857441	0.0475934	0.739248	0.0335394	2.42306	0.0161035	-5.74146	POLS
cg04692312	0.0491146	0.286158	0.0346298	2.41429	0.0164868	-5.76224
cg14038058	0.0454355	0.331192	0.0319946	2.41336	0.0165281	-5.76445	TRIM61
cg00570954	0.0426989	0.708247	0.030039	2.41144	0.0166134	-5.769
cg04899746	-0.0483137	0.674531	0.0329339	-2.40845	0.0167469	-5.77607	RPF2;RPF2
cg15754660	-0.0463796	0.427632	0.0316366	-2.3957	0.0173269	-5.80611	NPSR1;NPSR1
cg11454334	-0.0529983	0.200381	0.0360691	-2.38396	0.0178766	-5.83365	ARID3A
cg08217381	-0.0487213	0.338497	0.0332071	-2.38273	0.0179351	-5.83652	ARHGAP35
cg05802075	-0.0599584	0.207814	0.0407082	-2.37857	0.0181339	-5.84623	ARID5B
cg07899896	0.0525357	0.510007	0.0370861	2.37812	0.0181556	-5.84729	FAM13C;FAM13C;FAM13C;FAM13C
cg24093474	0.0457055	0.726848	0.0321878	2.36976	0.0185616	-5.86676	NDRG4;NDRG4;NDRG4;NDRG4;NDRG4;NDRG4;NDRG4;NDRG4
cg13023646	0.05156	0.357575	0.0363849	2.36679	0.0187079	-5.87366	TRIM61
cg06115838	0.105601	0.572461	0.0759424	2.36241	0.0189252	-5.88383
cg26491092	-0.0574893	0.261634	0.0390651	-2.35572	0.0192617	-5.89932
cg19451584	0.043529	0.627894	0.0306318	2.3466	0.0197291	-5.92038
cg12135269	-0.0545328	0.494016	0.0370938	-2.34477	0.019824	-5.9246	COLEC11;COLEC11;COLEC11;COLEC11;COLEC11;COLEC11;COLEC11;COLEC11;COLEC11;COLEC11;COLEC11
cg01777861	-0.0453051	0.361754	0.0309152	-2.33426	0.020377	-5.94875
cg23733394	-0.0570244	0.32117	0.0387553	-2.32053	0.0211201	-5.98015
cg16423285	0.120009	0.522036	0.086742	2.308	0.0218184	-6.00864
cg24652615	-0.0560048	0.730824	0.0380757	-2.30571	0.021948	-6.01382	TMEM151B
cg27387030	0.049278	0.243554	0.034747	2.30095	0.0222199	-6.02459	FMOD
cg20803293	0.0859375	0.376488	0.0613772	2.29955	0.0223007	-6.02776	GSTM5
cg26987645	0.049791	0.379027	0.0351149	2.28697	0.0230363	-6.05613	FMOD
cg09352518	0.0940855	0.349988	0.0673886	2.28662	0.0230571	-6.05691	ZNF714
cg03626541	0.044125	0.732841	0.0310577	2.275	0.0237555	-6.08296	BAIAP2L1
cg25830530	0.0692165	0.660052	0.0491468	2.27403	0.0238147	-6.08514	GNE;GNE;GNE
cg26504421	0.0510959	0.646036	0.0360516	2.26717	0.0242369	-6.10046	SDK2
cg10523679	-0.0745188	0.263713	0.0503412	-2.2666	0.024272	-6.10172	ACADM;ACADM
cg07529122	0.0525426	0.682907	0.037091	2.2615	0.0245902	-6.11307
cg25952596	-0.0452296	0.715627	0.0308644	-2.26031	0.0246649	-6.11572
cg03864958	0.0649178	0.746045	0.0460254	2.25949	0.0247167	-6.11755
cg11955878	0.0481556	0.297614	0.0339423	2.25573	0.0249551	-6.12591	TRIM61
cg22210251	-0.0448432	0.514581	0.0306049	-2.25539	0.0249767	-6.12666
cg10186901	-0.0619449	0.447033	0.0420282	-2.25378	0.025079	-6.13022
cg20302533	-0.0550168	0.193905	0.0374168	-2.23514	0.026294	-6.17137	POU6F2;POU6F2
cg01310397	0.0438316	0.840387	0.030848	2.235	0.0263039	-6.1717	MUC4;MUC4;MUC4
cg18850127	-0.0709449	0.553407	0.0479858	-2.23387	0.0263787	-6.17417	POU6F2;POU6F2
cg19301366	0.0762241	0.776802	0.0542552	2.22805	0.0267695	-6.18695	HLA-DQB1
cg22705602	0.0465607	0.533634	0.0327998	2.22805	0.0267698	-6.18696
cg16496269	0.0632806	0.490777	0.044839	2.22588	0.0269165	-6.1917
cg07193023	-0.046097	0.517268	0.0314469	-2.22351	0.0270779	-6.19689
cg20676255	-0.0452234	0.728097	0.0308603	-2.22142	0.027221	-6.20147	UNC13A
cg15212455	-0.0571776	0.703169	0.0388574	-2.22011	0.0273114	-6.20434	POU6F2;POU6F2
cg17667591	0.0526444	0.654001	0.0371642	2.21943	0.0273577	-6.20581	PADI6
cg25436886	-0.0508676	0.278569	0.0346444	-2.21873	0.0274061	-6.20735
cg11067347	-0.0689842	0.251102	0.046691	-2.21421	0.0277193	-6.2172	ZFYVE28;ZFYVE28;ZFYVE28;ZFYVE28
cg25813936	0.0493585	0.71836	0.0348047	2.21261	0.0278308	-6.22069	GNE
cg19945931	0.0464849	0.630048	0.0327456	2.21019	0.028001	-6.22597
cg05868443	0.0502752	0.326666	0.0354624	2.20421	0.028424	-6.23897
cg03916490	-0.0452015	0.908587	0.0308455	-2.20375	0.0284561	-6.23995	C7orf50;C7orf50;C7orf50
cg21095610	-0.0601259	0.616021	0.0408196	-2.18191	0.0300504	-6.28712
cg15549821	0.0622019	0.59126	0.044058	2.18179	0.0300596	-6.28738	PLEKHA4;PLEKHA4
cg01483656	0.0866463	0.267104	0.0618988	2.17917	0.0302559	-6.29301	ZNF714
cg15084585	0.0876839	0.420203	0.0626628	2.17343	0.0306898	-6.30531
cg17242729	0.0501996	0.56134	0.0354082	2.16243	0.0315367	-6.32881	AK9
cg00910586	0.0530355	0.716252	0.0374455	2.15062	0.0324677	-6.35389
cg25108548	-0.0507167	0.461122	0.0345434	-2.15036	0.0324888	-6.35445	KIAA1467
cg22875332	-0.0570837	0.381572	0.0387948	-2.14881	0.0326127	-6.35772	ACADM;ACADM
cg09314196	-0.0697988	0.324283	0.0472291	-2.14484	0.0329323	-6.36612	ZNF492
cg21297282	-0.0607231	0.480507	0.0412166	-2.14378	0.0330181	-6.36836	ST6GALNAC5
cg10071929	0.0518389	0.311402	0.0365854	2.13418	0.0338038	-6.3886	CIZ1;CIZ1;CIZ1;CIZ1;CIZ1
cg22452837	0.0625113	0.265344	0.044282	2.1322	0.0339682	-6.39277
cg08344422	0.0487014	0.297318	0.0343335	2.1321	0.0339765	-6.39298	FAM196A;DOCK1;DOCK1
cg10564845	0.0449274	0.25619	0.0316313	2.12825	0.0342972	-6.40106	DOCK1;DOCK1
cg06238316	0.0578509	0.296097	0.040914	2.12766	0.0343469	-6.4023	ZNF714
cg27098685	0.0470722	0.721695	0.0331661	2.12744	0.034365	-6.40275
cg07747251	0.0458054	0.697947	0.0322593	2.12685	0.0344146	-6.40399
cg13581166	0.0562277	0.741811	0.0397436	2.11585	0.035349	-6.427
cg09164108	-0.0442129	0.293887	0.0301812	-2.11543	0.0353854	-6.42788
cg23056271	0.0865898	0.729041	0.0618572	2.11317	0.0355804	-6.4326
cg24607783	0.0477608	0.31743	0.0336594	2.11187	0.0356925	-6.4353	PLSCR2
cg22459517	0.0962621	0.696197	0.0690002	2.1118	0.0356985	-6.43544	EPS8L1
cg10666140	-0.0509753	0.751481	0.0347164	-2.10502	0.0362901	-6.44953	SUN1;SUN1;SUN1;SUN1
cg21893210	0.066346	0.377759	0.0470614	2.10145	0.0366051	-6.45694	GLB1L;GLB1L;GLB1L
cg16789847	-0.07959	0.517605	0.0536735	-2.10036	0.0367017	-6.4592	LCE3B
cg16747922	0.0491759	0.158243	0.0346738	2.09607	0.0370845	-6.46809	ZFYVE28;ZFYVE28;ZFYVE28;ZFYVE28
cg07679219	0.0469047	0.812377	0.0330461	2.09128	0.0375151	-6.47797	E2F7
cg27173819	-0.044043	0.238274	0.030067	-2.06876	0.0395997	-6.52419	STK32C
cg00378211	0.0467437	0.401963	0.0329309	2.06209	0.0402355	-6.53778
cg26844603	0.0514594	0.556727	0.0363127	2.06048	0.0403904	-6.54106	TMEM87B
cg22410499	-0.0519134	0.264669	0.0353439	-2.06018	0.0404196	-6.54168	PRSS3
cg04387835	-0.050591	0.491575	0.0344593	-2.05746	0.0406818	-6.54719	ZMYND15;ZMYND15
cg24252907	-0.046991	0.683753	0.0320469	-2.05719	0.0407084	-6.54775	PDE11A;PDE11A;PDE11A;PDE11A
cg01612182	-0.0550332	0.61976	0.0374277	-2.05396	0.0410225	-6.5543	HAPLN2;HAPLN2
cg17872886	-0.046374	0.476508	0.0316329	-2.0526	0.041155	-6.55705	COLEC11;COLEC11;COLEC11;COLEC11
cg17566325	0.06236	0.517682	0.0441725	2.04909	0.0414999	-6.56415
cg12159023	-0.0486851	0.784531	0.0331829	-2.04151	0.0422532	-6.57947	HCN2
cg01962183	0.0433673	0.707785	0.0305163	2.04138	0.0422661	-6.57973	CLCN7;CLCN7
cg08269402	0.0901894	0.627646	0.06451	2.03927	0.0424773	-6.58397	HLA-DRB1
cg20002756	0.0463091	0.665092	0.0326198	2.03286	0.0431262	-6.59686
cg15933560	-0.0753699	0.606924	0.0509012	-2.0279	0.0436341	-6.60681
cg05857996	0.0543391	0.723134	0.0383833	2.02499	0.0439337	-6.61262	EBF4
cg03615426	0.074292	0.353702	0.0528442	2.01826	0.0446354	-6.62607	IQCK;IQCK;IQCK;IQCK;IQCK
cg22343728	-0.0521566	0.610782	0.0355065	-2.01343	0.0451442	-6.63568
cg10602248	0.0506296	0.535848	0.0357168	2.01328	0.0451601	-6.63598	GLB1L;GLB1L;GLB1L;GLB1L;GLB1L
cg14614789	0.0727036	0.193069	0.0516857	2.01066	0.0454376	-6.64117
cg25828445	0.0606815	0.851689	0.0429583	1.99917	0.0466758	-6.66395
cg01166985	0.0491832	0.470848	0.0346789	1.99798	0.0468051	-6.66629	RPH3AL;RPH3AL;RPH3AL;RPH3AL
cg20398163	0.0794201	0.414111	0.0565933	1.98682	0.0480368	-6.68825	ATG5;ATG5;ATG5;ATG5;ATG5;ATG5;ATG5
cg11949518	-0.0825393	0.554744	0.055606	-1.98616	0.0481102	-6.68954	RPTOR;RPTOR
cg19399219	-0.0454364	0.725927	0.0310034	-1.98078	0.0487152	-6.7001
cg02229781	0.0530148	0.251292	0.0374306	1.97971	0.0488365	-6.7022	MIR548F3
cg22992730	0.0625079	0.587036	0.0442795	1.97685	0.0491604	-6.70778
cg27105123	0.0498156	0.742074	0.0351326	1.97347	0.0495458	-6.71437
cg19654323	-0.0444388	0.217945	0.030333	-1.97202	0.0497125	-6.7172

## Sheet: SM Table 7
Overview of DMPs associated with the Specific Effects of Risperidone (nominal p.value < 0.05 and Δmethylation > 3%)
CpGs	logFC	AveExpr	Abs_meth_diff	t	P.Value	B	gene
cg22838050	-0.106088	0.570086	0.0708961	-5.23542	3.49778e-07	4.49415	MED16
cg15231942	-0.0970824	0.578102	0.0650782	-4.37982	1.74985e-05	0.718414	MED16
cg03680507	0.0665304	0.387896	0.0471952	4.26934	2.78862e-05	0.272369	RIN3
cg19256400	-0.0467292	0.505151	0.0318713	-4.17263	4.16157e-05	-0.110011	FAM123C;FAM123C;FAM123C;FAM123C
cg27167221	0.0623757	0.477969	0.0441838	3.92045	0.000114266	-1.07098	CAMTA1
cg06726820	0.0497619	0.454239	0.0350941	3.88331	0.000132042	-1.20806	RBP1;RBP1;RBP1
cg05108508	-0.0445552	0.713249	0.0304113	-3.8475	0.000151638	-1.33911	GGACT
cg14735347	-0.0523358	0.795438	0.0356263	-3.84151	0.000155174	-1.36093	TMEM131
cg15765251	-0.0725393	0.703331	0.0490373	-3.83327	0.000160163	-1.39088	MED16
cg24041556	0.0571969	0.76174	0.0404423	3.79709	0.000183936	-1.52178	SLC44A2;SLC44A2
cg14781605	0.051942	0.305089	0.0366594	3.75866	0.000212818	-1.65959	ALPL
cg03251378	-0.0686923	0.396693	0.0464981	-3.65119	0.00031803	-2.03835	NLRP2;NLRP2;NLRP2;NLRP2
cg17965690	0.0572884	0.715338	0.0405082	3.59495	0.000390995	-2.23262	SLC44A2;SLC44A2
cg04676527	0.0450328	0.657466	0.0317067	3.59056	0.000397317	-2.24769
cg18843555	-0.0561957	0.668945	0.038203	-3.58872	0.000399994	-2.254	TMEM82
cg09670971	-0.0858808	0.756264	0.0577909	-3.58041	0.000412276	-2.28241	MED16
cg08818610	0.0773798	0.282924	0.0551001	3.56089	0.000442563	-2.34897	FAM65B
cg04558115	-0.0458713	0.604054	0.0312954	-3.54484	0.000469014	-2.40345
cg01024444	-0.0589456	0.323337	0.0400345	-3.54229	0.000473347	-2.41208	HAS1
cg10198174	0.0491581	0.692314	0.0346609	3.53898	0.000479031	-2.42327	FAM228B;FAM228B
cg09315367	0.0451981	0.727623	0.0318249	3.42161	0.000727341	-2.81422	SLC44A2;SLC44A2
cg01003599	-0.0474065	0.633014	0.0323257	-3.36571	0.000883979	-2.99624	VASH2;VASH2;VASH2
cg18557149	0.0473765	0.384128	0.033384	3.34228	0.000958538	-3.07169	LOC650226
cg04445210	0.045101	0.667951	0.0317554	3.3239	0.0010211	-3.13056
cg02220965	-0.0510125	0.282339	0.0347413	-3.31736	0.00104425	-3.15142	MYST1;MYST1
cg20188490	0.0574738	0.705372	0.040642	3.30099	0.0011044	-3.20352	PRH2;PRH2;PRR4;PRH1
cg01412970	-0.0951015	0.400855	0.0637936	-3.28698	0.00115838	-3.24788	PLD6
cg01050920	-0.047714	0.421095	0.0325319	-3.27691	0.00119873	-3.2797	SMPDL3A
cg09506037	0.0536466	0.335366	0.037885	3.25316	0.00129904	-3.35432	NCKAP5;NCKAP5
cg10123377	0.222688	0.372799	0.166906	3.22832	0.00141227	-3.43185
cg00093095	-0.0548012	0.42124	0.0372729	-3.20149	0.00154477	-3.51495	DNAH17
cg17826679	0.0496874	0.700999	0.0350406	3.19157	0.00159664	-3.54553	SLC44A2;SLC44A2
cg13524876	0.0455176	0.467032	0.0320534	3.19141	0.00159748	-3.54602	CLSTN2
cg05822532	0.0493487	0.292614	0.0347977	3.18018	0.00165819	-3.58054	ELN;ELN;ELN;ELN;ELN
cg05491854	0.0547831	0.427312	0.0387029	3.17863	0.00166672	-3.58529	FAM65B
cg25385940	0.0810209	0.325804	0.0577663	3.1699	0.00171561	-3.61203	TTC23;TTC23;TTC23;TTC23;TTC23;TTC23;TTC23;TTC23;TTC23;TTC23;TTC23;TTC23;TTC23;TTC23
cg15782228	-0.058347	0.475527	0.0396362	-3.16918	0.00171966	-3.61421	LAMA5
cg27211295	-0.0526606	0.269374	0.0358434	-3.1583	0.00178256	-3.64743	NLRP2;NLRP2;NLRP2;NLRP2
cg14716792	0.0428278	0.802215	0.030131	3.15367	0.00180999	-3.66154	OR4A15
cg11534391	-0.0640263	0.65585	0.0434093	-3.14788	0.00184479	-3.67914	PDZRN4;PDZRN4
cg09050832	-0.0812379	0.645478	0.0547537	-3.13417	0.00192973	-3.72072
cg08133496	0.0451926	0.492639	0.0318209	3.11431	0.00205918	-3.78065	EXT2;EXT2
cg07425855	0.0514527	0.517311	0.0363079	3.11135	0.00207913	-3.78954	GPM6A;GPM6A;GPM6A;GPM6A;GPM6A;GPM6A
cg06155303	-0.049594	0.270529	0.0337918	-3.09114	0.00222029	-3.85011
cg14798125	0.049493	0.561721	0.0349012	3.08218	0.00228569	-3.87686	GPR52;RABGAP1L
cg12662887	-0.0568723	0.456465	0.038654	-3.07638	0.00232893	-3.89412	NEURL
cg21603975	-0.0494303	0.580999	0.0336821	-3.07054	0.00237327	-3.91148	MIR186;ZRANB2;ZRANB2
cg04248271	-0.0497668	0.322555	0.0339075	-3.05629	0.00248464	-3.95369	EBF1
cg11557463	-0.0572541	0.502214	0.0389084	-3.04474	0.00257842	-3.98777
cg21603676	-0.0643965	0.259566	0.0436547	-3.02567	0.00274053	-4.04382	LOC101927815;LOC101927815
cg06191260	0.0466265	0.327956	0.032847	3.02342	0.00276021	-4.05039	MAPK4
cg23197837	-0.0470568	0.648598	0.0320911	-3.01674	0.00281956	-4.06993	SLC38A10;SLC38A10
cg06853489	0.0441617	0.508394	0.0310839	3.0123	0.00285961	-4.08288
cg22797297	0.0506175	0.697535	0.0357081	3.00552	0.00292189	-4.10265
cg22398783	-0.0439909	0.704311	0.0300319	-2.9995	0.00297818	-4.12017
cg10145000	-0.0467385	0.381099	0.0318775	-2.99641	0.00300742	-4.12913
cg05179723	0.0472962	0.800796	0.0333265	2.99433	0.00302729	-4.13517	ATRN
cg08951638	0.0482595	0.543917	0.0340167	2.97172	0.00325099	-4.20053
cg01679206	0.0442498	0.230959	0.0311469	2.96966	0.00327211	-4.20646	WBSCR27
cg05056638	-0.0543908	0.60769	0.036999	-2.96758	0.00329352	-4.21243
cg14311362	0.0458448	0.35332	0.0322875	2.95999	0.00337287	-4.23424
cg00255882	0.0546078	0.26538	0.0385767	2.95167	0.0034619	-4.25809	WDR33;WDR33;WDR33
cg23719516	-0.0864607	0.316479	0.0581695	-2.9434	0.00355247	-4.28172
cg03842440	-0.0681656	0.7189	0.0461499	-2.9432	0.00355476	-4.28231	PDZRN4;PDZRN4
cg19777540	-0.0533366	0.361739	0.0362951	-2.92402	0.00377337	-4.33689	PCDHA2;PCDHA1;PCDHA1;PCDHA3;PCDHA3
cg25601471	-0.0650426	0.779965	0.0440829	-2.92027	0.00381755	-4.34752
cg16528039	-0.0579849	0.568221	0.0393951	-2.91868	0.00383649	-4.35205
cg03128011	-0.0840434	0.506395	0.0565901	-2.90818	0.00396322	-4.38173
cg22034735	-0.0711468	0.552199	0.0481189	-2.90675	0.00398077	-4.38577
cg26174215	-0.0450253	0.62636	0.0307272	-2.90147	0.00404617	-4.40064
cg25285794	-0.0441444	0.138764	0.0301352	-2.90107	0.00405113	-4.40176	HOXC8
cg08316083	-0.0526291	0.193396	0.0358224	-2.89285	0.00415514	-4.4249	ATP8B3
cg21419585	-0.0457908	0.404337	0.0312413	-2.88904	0.00420406	-4.43558	FAM46C
cg10925265	0.054871	0.503913	0.0387662	2.88865	0.00420914	-4.43668	SND1
cg04368971	-0.0487605	0.352656	0.0332334	-2.88692	0.00423167	-4.44155	SERPINA11
cg25482767	-0.0521633	0.713376	0.035511	-2.88601	0.00424344	-4.44408
cg16836250	-0.078335	0.620027	0.0528499	-2.87897	0.00433615	-4.46379
cg15272979	0.0439564	0.748401	0.0309372	2.86677	0.00450119	-4.49783	KALRN;KALRN
cg20916523	-0.060417	0.443378	0.0410131	-2.86442	0.0045337	-4.50439	VHL;VHL
cg24312680	-0.0513123	0.459105	0.0349419	-2.8616	0.00457286	-4.51222	HSPA4L
cg11020480	-0.0602827	0.274289	0.0409238	-2.8531	0.00469303	-4.53585	LINC00211
cg18517222	-0.0439578	0.779595	0.0300097	-2.85149	0.00471598	-4.54029
cg21366199	-0.0567933	0.616313	0.0386014	-2.84862	0.00475736	-4.54824
cg16152871	-0.0457799	0.516089	0.0312341	-2.83674	0.00493216	-4.58107	OPCML
cg10544218	0.0446713	0.757845	0.0314482	2.83626	0.00493933	-4.58239	CEP44
cg19472310	0.0456981	0.195331	0.0321825	2.8267	0.00508439	-4.60871
cg08805904	-0.0505751	0.512918	0.0344486	-2.82415	0.00512382	-4.61573	CIB4
cg13401703	0.0698644	0.280326	0.049618	2.82383	0.00512879	-4.61661	TTC23;TTC23;TTC23;TTC23;TTC23;TTC23;TTC23;TTC23;TTC23;TTC23;TTC23;TTC23;TTC23;TTC23
cg16981703	-0.050348	0.312128	0.0342967	-2.81261	0.00530527	-4.64735
cg13590223	0.0518264	0.660628	0.0365764	2.81112	0.00532925	-4.65145	GP6;GP6;GP6
cg15589394	0.0470765	0.707247	0.0331692	2.8107	0.0053359	-4.65258
cg16958594	-0.0637975	0.452404	0.0432575	-2.80426	0.00544028	-4.67017	VARS2;VARS2;VARS2
cg03432774	-0.0517233	0.633778	0.0352168	-2.79608	0.00557557	-4.69247	KIF17;KIF17
cg17468877	-0.0461709	0.566119	0.0314965	-2.78918	0.00569203	-4.71122
cg19778375	-0.0453645	0.921946	0.0309551	-2.78893	0.00569621	-4.71189
cg05867245	-0.165683	0.719264	0.108494	-2.77952	0.00585866	-4.73739	ZBTB46
cg18959621	-0.0495749	0.739306	0.033779	-2.77871	0.00587292	-4.73959
cg06577400	0.0925675	0.524567	0.0662661	2.77726	0.00589845	-4.74352
cg17239008	0.0654902	0.422392	0.0464404	2.77548	0.00592983	-4.74833
cg17569124	0.0565337	0.617409	0.0399641	2.77295	0.00597459	-4.75514	HOXA5
cg24178897	-0.0443901	0.677556	0.0303003	-2.75573	0.00628844	-4.80151
cg07142009	0.0552195	0.253953	0.0390172	2.75496	0.00630274	-4.80357
cg15911328	-0.052922	0.340925	0.0360181	-2.75096	0.00637802	-4.81431	PCDHB8
cg14580085	-0.101488	0.496631	0.0679288	-2.73863	0.00661468	-4.84727
cg24475182	-0.0572183	0.295784	0.0388845	-2.73614	0.00666345	-4.85391
cg24790788	-0.0477887	0.485763	0.032582	-2.73548	0.00667646	-4.85568	PLOD2;PLOD2
cg09232555	-0.129514	0.442147	0.0858608	-2.72614	0.00686253	-4.88052
cg14544673	0.0473423	0.493533	0.0333595	2.72274	0.00693148	-4.88955	FAM222A
cg23733394	0.0732967	0.32117	0.0521181	2.7138	0.00711569	-4.91324
cg21416022	0.0517432	0.187495	0.0365166	2.71259	0.00714102	-4.91645	TTC23;TTC23;TTC23;TTC23;TTC23;TTC23;TTC23;TTC23;TTC23;TTC23;TTC23;TTC23;TTC23;TTC23
cg20237074	-0.0522517	0.836684	0.0355701	-2.71183	0.00715695	-4.91846
cg23936031	0.0496184	0.724028	0.0349912	2.70532	0.00729456	-4.93565	HOXA5
cg16065768	-0.0455498	0.342398	0.0310795	-2.70032	0.00740185	-4.94882
cg20088245	-0.0908791	0.535729	0.0610496	-2.69548	0.00750718	-4.96157
cg09207400	0.0438178	0.603676	0.0308381	2.67988	0.00785547	-5.00244	HOXA5;HOXA-AS3
cg08625990	0.0466938	0.624744	0.0328952	2.67404	0.00798975	-5.01771	LOC154449
cg16409883	0.0584821	0.618412	0.0413695	2.67226	0.00803102	-5.02235	TPX2
cg08799816	-0.0527848	0.168742	0.0359264	-2.66504	0.0082004	-5.04114	RADIL
cg22238209	-0.0826692	0.808706	0.0556911	-2.66068	0.00830432	-5.05247	MAG;MAG
cg15410835	0.05449	0.56506	0.038492	2.65679	0.00839818	-5.06258
cg22318514	-0.0652426	0.307752	0.0442154	-2.64873	0.00859536	-5.08345
cg02210441	-0.0613519	0.454201	0.0416343	-2.64293	0.00873967	-5.09841	LOC101927815;LOC101927815
cg07732735	0.0567375	0.506442	0.040111	2.63748	0.00887759	-5.11248	TTC23;TTC23;TTC23;TTC23
cg11166453	-0.0450434	0.631839	0.0307394	-2.62897	0.00909655	-5.13436
cg21206147	-0.0659252	0.353748	0.0446675	-2.62519	0.00919532	-5.14406	KLHL29
cg25307665	0.0553715	0.635519	0.0391266	2.61287	0.00952391	-5.17556	HOXA5
cg03829739	0.0540497	0.463466	0.038175	2.60792	0.00965899	-5.18818	LOC650226
cg06610036	0.0463989	0.437377	0.032684	2.59809	0.00993232	-5.21319	GPM6A;GPM6A;GPM6A;GPM6A;GPM6A;GPM6A
cg27508314	0.0445224	0.483795	0.0313417	2.59623	0.00998488	-5.21792
cg24840300	-0.0697345	0.710948	0.0471867	-2.59615	0.00998718	-5.21813	LPPR3
cg02490460	-0.0677301	0.68532	0.045862	-2.59305	0.010075	-5.22596
cg05282889	0.0450465	0.485748	0.0317164	2.59279	0.0100824	-5.22663
cg26163234	0.0442614	0.16715	0.0311551	2.59247	0.0100917	-5.22745	TTC23;TTC23;TTC23;TTC23;TTC23;TTC23;TTC23;TTC23;TTC23;TTC23;TTC23;TTC23;TTC23;TTC23
cg07627692	0.0577894	0.669877	0.0408696	2.58612	0.0102744	-5.24352	NLGN1
cg22771759	0.051599	0.194207	0.036413	2.56632	0.0108633	-5.29337
cg16786808	0.0552322	0.51264	0.0390263	2.56307	0.0109631	-5.30154	EPHA4
cg11179009	0.0464723	0.467285	0.0327366	2.55241	0.0112952	-5.3282
cg00055529	-0.0493195	0.436189	0.0336079	-2.5438	0.0115701	-5.34966	FBXO47
cg09146471	0.0550474	0.267733	0.0388932	2.54182	0.0116342	-5.35459	TTC23;TTC23;TTC23;TTC23
cg15167603	-0.0583981	0.763032	0.0396701	-2.54047	0.011678	-5.35794	TMEM150B;TMEM150B;TMEM150B;TMEM150B
cg20432211	-0.0512158	0.433571	0.0348773	-2.53387	0.0118945	-5.37433
cg05202300	0.0509204	0.42997	0.0359256	2.53237	0.0119441	-5.37804
cg20636526	-0.048739	0.639772	0.033219	-2.52634	0.0121459	-5.39297	C6orf10
cg16714791	0.0484968	0.594711	0.0341868	2.51773	0.0124389	-5.41421	MTRR;FASTKD3;FASTKD3;FASTKD3;MTRR
cg08777654	-0.0722986	0.599398	0.0488786	-2.51419	0.0125615	-5.42294	REREP3
cg02707176	-0.0601756	0.413148	0.0408526	-2.50394	0.0129217	-5.44811	PCDHGA4;PCDHGA9;PCDHGA1;PCDHGB1;PCDHGB7;PCDHGB6;PCDHGB3;PCDHGA6;PCDHGA8;PCDHGA10;PCDHGA5;PCDHGB4;PCDHGB7;PCDHGA3;PCDHGA2;PCDHGB2;PCDHGA7;PCDHGB5
cg04483142	0.044723	0.50403	0.0314851	2.50219	0.0129843	-5.4524
cg13126979	0.0455654	0.40161	0.0320876	2.5005	0.0130447	-5.45654	MRPS34;MRPS34;EME2
cg20128672	0.0519222	0.410478	0.0366452	2.4972	0.0131637	-5.46461	C11orf45;KCNJ5
cg06060754	-0.107868	0.57946	0.0720419	-2.49205	0.0133514	-5.4772	RGS14
cg07973095	-0.0653929	0.194227	0.044315	-2.48924	0.0134547	-5.48405	DECR2
cg05626073	0.0597111	0.386157	0.0422571	2.48753	0.0135179	-5.48821	AP2A2
cg14716990	-0.0567438	0.412665	0.0385683	-2.47939	0.0138227	-5.50802
cg20183705	-0.050934	0.321001	0.0346888	-2.47388	0.0140323	-5.52138	ATXN1;ATXN1
cg15031253	0.0506538	0.8448	0.0357342	2.47319	0.0140587	-5.52305	NLRP2
cg20718640	-0.0509544	0.849042	0.0347024	-2.47309	0.0140625	-5.52329	PDXK
cg27234230	0.0430981	0.688497	0.030324	2.4717	0.0141161	-5.52666
cg00430355	0.0603595	0.503433	0.0427256	2.466	0.0143372	-5.54046
cg11123440	-0.0650341	0.635904	0.0440773	-2.46252	0.0144736	-5.54885
cg15747436	-0.0703043	0.444651	0.0475629	-2.45868	0.0146254	-5.5581	ATHL1
cg21324555	0.0470514	0.378762	0.0331512	2.45313	0.0148475	-5.57146	PCBD1;PCBD1
cg13944838	-0.0890498	0.723912	0.0598582	-2.45308	0.0148496	-5.57158	GFPT2
cg02802029	-0.0460997	0.513483	0.0314488	-2.4499	0.014978	-5.57922	PLOD2;PLOD2
cg13854012	0.0455626	0.82745	0.0320856	2.44347	0.0152412	-5.59464
cg21648019	-0.0445832	0.724983	0.0304301	-2.44301	0.0152603	-5.59575	OR51E1
cg12541534	-0.0531877	0.650731	0.0361956	-2.4404	0.0153681	-5.60199
cg05374025	-0.0567856	0.480574	0.0385962	-2.4386	0.0154432	-5.6063	GP6;GP6
cg25521439	0.0443718	0.42554	0.031234	2.43859	0.0154436	-5.60632	HDAC4
cg07274898	-0.0511537	0.212056	0.0348358	-2.43515	0.0155876	-5.61454
cg04082016	0.0804291	0.488714	0.0573325	2.4343	0.0156235	-5.61657
cg22023206	0.0698272	0.544109	0.0495909	2.43275	0.0156886	-5.62025
cg26076054	-0.0580164	0.801805	0.0394161	-2.42928	0.0158363	-5.62854	AHRR
cg00688402	0.0432261	0.487395	0.0304154	2.42322	0.0160966	-5.64295	SLC17A9
cg19832721	0.0546709	0.60102	0.0386222	2.42171	0.0161618	-5.64653	KIAA1267
cg04743171	-0.0498358	0.471595	0.0339537	-2.4196	0.0162536	-5.65153
cg05306860	0.070553	0.416598	0.0501192	2.41693	0.0163705	-5.65787	FLII;FLII;FLII
cg24984195	0.0729643	0.366134	0.0518758	2.40892	0.0167256	-5.67682	UBE2I;UBE2I;UBE2I;UBE2I
cg01895504	-0.0595744	0.470493	0.0404529	-2.40771	0.0167799	-5.67968	OPCML
cg03427322	-0.0677766	0.349202	0.0458927	-2.40639	0.0168392	-5.6828	LOC101927815;LOC101927815
cg05481257	0.0742767	0.386821	0.0528331	2.40355	0.0169678	-5.68951	GDF7
cg26532320	-0.0451523	0.476253	0.0308125	-2.39767	0.0172361	-5.70336	IRF8
cg17496939	0.0650266	0.437993	0.0461042	2.39629	0.0172995	-5.70659	CTIF;CTIF
cg20870820	-0.048937	0.754315	0.0333517	-2.38982	0.0176003	-5.72179	ABR;ABR
cg20503657	-0.0862947	0.350873	0.0580612	-2.3859	0.0177846	-5.73097
cg18838701	-0.0670103	0.353179	0.0453858	-2.38519	0.0178183	-5.73264	TNNI3
cg03249723	-0.0936446	0.487579	0.0628477	-2.38512	0.0178216	-5.7328	LOC158434
cg08444117	0.0486715	0.682505	0.0343121	2.38156	0.0179908	-5.74113
cg13090418	-0.0450834	0.646686	0.0307662	-2.38013	0.0180588	-5.74445	NRP1;NRP1;NRP1;NRP1;NRP1;NRP1
cg04915618	-0.0481954	0.629358	0.0328547	-2.37918	0.0181045	-5.74668	KALRN;KALRN
cg00597623	0.0467423	0.697472	0.0329298	2.37908	0.0181091	-5.7469
cg15208687	-0.0506751	0.457781	0.0345156	-2.3789	0.018118	-5.74734
cg11265221	0.088812	0.414383	0.0634941	2.3784	0.0181421	-5.74851	CEP44
cg07755735	0.0619743	0.364518	0.0438934	2.37488	0.0183121	-5.75672	GDF7
cg25653641	-0.0605568	0.683376	0.0411061	-2.3728	0.0184131	-5.76156
cg06322356	0.0636013	0.243195	0.0450712	2.37136	0.0184831	-5.7649
cg08713344	-0.0578006	0.813854	0.0392724	-2.37071	0.018515	-5.76642	PITRM1-AS1;PITRM1;PITRM1;PITRM1
cg15829969	-0.0445134	0.627962	0.0303832	-2.36757	0.0186693	-5.77372
cg07158505	-0.138267	0.436539	0.0913901	-2.36648	0.0187232	-5.77626
cg01353941	-0.05577	0.712084	0.0379192	-2.36461	0.0188157	-5.78059
cg01655667	0.0491738	0.603075	0.0346722	2.36331	0.0188806	-5.78362
cg03245831	0.0688848	0.194816	0.0489056	2.36026	0.0190331	-5.79069
cg13603125	0.0479777	0.569247	0.0338148	2.35379	0.0193598	-5.80565	ARHGEF10L;ARHGEF10L
cg25010788	-0.0511926	0.207257	0.0348618	-2.35373	0.0193628	-5.80579	NKAIN1
cg18355337	-0.0589866	0.696277	0.0400618	-2.34731	0.0196923	-5.82061	GP6;GP6
cg20004147	0.128026	0.405311	0.0927972	2.34549	0.0197868	-5.82482
cg16600909	0.0494638	0.772634	0.0348802	2.34529	0.0197972	-5.82528
cg13092405	-0.0557976	0.386351	0.0379376	-2.34491	0.0198165	-5.82614
cg17537073	0.0604973	0.14049	0.0428252	2.34331	0.0199	-5.82983
cg08449403	0.081104	0.698366	0.0578272	2.34182	0.0199778	-5.83325
cg11102724	0.146696	0.230151	0.107032	2.34053	0.0200457	-5.83623
cg13590055	-0.0592335	0.31922	0.0402261	-2.3405	0.0200471	-5.83629	LOC100130522;LOC100130522;PARD6G
cg21048050	0.0868797	0.563541	0.0620706	2.33764	0.0201979	-5.84287	DMXL2;DMXL2;DMXL2
cg20771596	-0.0470483	0.700457	0.0320854	-2.33469	0.0203542	-5.84963	GCSAML;GCSAML;GCSAML;GCSAML;GCSAML;GCSAML;GCSAML
cg02524205	0.0602469	0.582874	0.0426442	2.32415	0.020922	-5.87376
cg21073930	-0.0559173	0.754946	0.0380174	-2.32103	0.0210925	-5.88087	MAST1
cg20124410	-0.0889963	0.66111	0.0598234	-2.3176	0.0212812	-5.88867
cg03122674	0.050623	0.538485	0.0357121	2.31602	0.0213692	-5.89229	LOC650226
cg09074113	0.0642386	0.584711	0.045533	2.31413	0.0214744	-5.89659	GDF7
cg06657721	-0.0467489	0.55442	0.0318845	-2.30882	0.0217722	-5.90865
cg04863892	0.0491497	0.718698	0.0346549	2.30526	0.0219737	-5.9167	HOXA5
cg04117566	-0.0851318	0.396134	0.0573016	-2.2982	0.0223786	-5.93267
cg18522231	-0.0946775	0.331384	0.0635185	-2.29079	0.0228104	-5.94938
cg03475776	0.0568229	0.600337	0.0401726	2.29007	0.0228528	-5.951	HDAC4
cg19044579	0.0603289	0.71726	0.0427034	2.28866	0.0229363	-5.95419
cg19759481	0.0441359	0.75411	0.0310655	2.28362	0.0232358	-5.96552	HOXA5
cg02891314	-0.104565	0.662964	0.0699147	-2.28167	0.0233524	-5.96989	GFPT2
cg18128914	0.0811342	0.623038	0.0578493	2.27476	0.0237699	-5.98535	LOXL1
cg11755635	-0.0542355	0.842591	0.0368954	-2.27197	0.0239406	-5.99159	AICDA
cg24309769	-0.142298	0.6234	0.0939255	-2.27135	0.0239787	-5.99298	A2ML1
cg11640175	0.0523402	0.26519	0.0369456	2.27096	0.0240029	-5.99386	TTC23;TTC23;TTC23
cg01476442	-0.130419	0.568783	0.086434	-2.26768	0.0242048	-6.00116	FAM189A1
cg19815565	-0.0550955	0.291879	0.0374693	-2.26763	0.0242084	-6.00129	LOC100130522;LOC100130522;PARD6G
cg23779604	0.0673591	0.265197	0.0477969	2.26503	0.0243695	-6.00707
cg05697527	0.047319	0.607327	0.0333428	2.26126	0.0246055	-6.01547	FBN1
cg18561199	-0.142407	0.477519	0.0939938	-2.25516	0.024991	-6.02901	SERPINA4;SERPINA4;SERPINA4
cg07984212	-0.0561445	0.0917491	0.0381689	-2.2531	0.0251226	-6.03359	HLA-DQB1
cg10403394	0.0460773	0.388497	0.0324538	2.25054	0.0252868	-6.03926	TPM1;TPM1;TPM1;TPM1;TPM1;TPM1;TPM1
cg06643020	0.0561282	0.239083	0.0396718	2.24487	0.025654	-6.0518	FARP2;FARP2;FARP2
cg08203479	0.0466539	0.531157	0.0328666	2.24176	0.0258568	-6.05865
cg00737841	-0.0447521	0.791142	0.0305436	-2.24117	0.0258959	-6.05996
cg05579559	-0.129563	0.638712	0.0858914	-2.24078	0.0259212	-6.06081	TMEM132D
cg03310427	0.0666764	0.592203	0.0473012	2.24028	0.0259541	-6.06192
cg01128039	0.126858	0.272403	0.0919133	2.23995	0.0259762	-6.06265	SIRPB1;SIRPB1;SIRPB1
cg17509989	-0.140972	0.44981	0.0930922	-2.23713	0.0261619	-6.06885	RGS14
cg18009484	-0.0510518	0.562725	0.0347676	-2.23477	0.0263192	-6.07406	NTM
cg03651525	-0.0504488	0.348773	0.0343641	-2.23408	0.0263649	-6.07557	CCDC25;CCDC25;CCDC25;CCDC25;CCDC25;CCDC25
cg07286216	0.0485123	0.455491	0.0341979	2.23121	0.0265567	-6.08186	LOC650226
cg03781731	0.0500326	0.623604	0.0352883	2.22721	0.0268269	-6.09066	WBSCR27
cg03192273	0.128546	0.193646	0.0931916	2.22448	0.0270122	-6.09663
cg23099319	0.0464521	0.645366	0.0327221	2.22281	0.027126	-6.10028	ADARB2
cg14780466	0.0699731	0.462108	0.0496971	2.21992	0.0273238	-6.10659	GDF7
cg27220932	0.0473422	0.385737	0.0333595	2.218	0.0274565	-6.11079
cg03411475	0.0439143	0.659014	0.0309071	2.20707	0.0282211	-6.1346	SVIL;SVIL
cg10138430	0.0433159	0.437925	0.0304795	2.20059	0.0286825	-6.14865	ALOX5AP;ALOX5AP
cg25828445	-0.0734509	0.851689	0.049638	-2.19678	0.0289572	-6.15691
cg13872898	0.0435288	0.764738	0.0306316	2.19265	0.0292571	-6.16582
cg17894854	-0.0712868	0.550678	0.0482113	-2.19157	0.0293357	-6.16815	EPHA5;EPHA5;EPHA5;EPHA5;EPHA5
cg23248424	-0.0946616	0.683717	0.0635081	-2.18933	0.0295006	-6.173	GFPT2
cg01119278	-0.0546738	0.527721	0.0371879	-2.18891	0.0295313	-6.1739	DDO;DDO
cg10962762	-0.0519926	0.465547	0.0353969	-2.18624	0.0297281	-6.17964
cg00274965	-0.0949474	0.347618	0.0636936	-2.18193	0.030049	-6.18892
cg20534585	0.0502702	0.584389	0.0354588	2.17748	0.0303825	-6.19846	LRRC33
cg23902114	0.0450878	0.468113	0.031746	2.17553	0.0305305	-6.20266
cg00698771	-0.0536368	0.361486	0.0364956	-2.17493	0.0305753	-6.20392
cg14799392	0.0599676	0.480281	0.0424423	2.17226	0.030779	-6.20966	ALOX5AP;ALOX5AP
cg24786174	0.0565444	0.500562	0.0399718	2.16439	0.0313839	-6.22646	ZNF516
cg07901857	-0.0485709	0.64113	0.0331064	-2.16423	0.0313962	-6.2268
cg14789911	-0.058377	0.690075	0.0396561	-2.16135	0.0316205	-6.23294	C21orf56;C21orf56
cg24723637	0.046591	0.585598	0.0328215	2.15815	0.0318713	-6.23975
cg05547895	-0.0836287	0.40609	0.0563189	-2.15388	0.0322085	-6.24882
cg08922308	0.0739592	0.636337	0.0526014	2.14645	0.0328022	-6.26456	MIR492
cg21042336	0.0510584	0.657555	0.0360247	2.14525	0.0328993	-6.2671	OSBPL1A
cg00321709	-0.0816746	0.231985	0.0550398	-2.14475	0.0329398	-6.26816	CYP2E1
cg00106564	0.0775039	0.13164	0.0551908	2.14059	0.0332777	-6.27694	DOCK8;DOCK8;DOCK8
cg13425888	0.0432	0.888579	0.0303968	2.12857	0.0342705	-6.30222	NLRP2
cg08659204	0.0429541	0.601499	0.0302212	2.12837	0.034287	-6.30264
cg24540763	-0.101827	0.483504	0.0681481	-2.1258	0.0345032	-6.30804	WDR66;WDR66
cg05030553	-0.0457109	0.719576	0.0311877	-2.12559	0.034521	-6.30848
cg05200811	-0.080572	0.606878	0.0543174	-2.12473	0.034593	-6.31027
cg10296238	0.104589	0.408851	0.0751878	2.12157	0.0348605	-6.31689	C21orf56;C21orf56
cg10186901	0.064281	0.447033	0.0455637	2.11721	0.0352322	-6.32599
cg24223558	-0.0447566	0.507716	0.0305466	-2.11498	0.0354244	-6.33066
cg04395153	-0.0584326	0.791535	0.0396931	-2.11357	0.0355454	-6.33359	MYOG
cg06132598	0.0430224	0.541414	0.0302699	2.11345	0.0355563	-6.33385	NACC2
cg23567120	-0.0463313	0.750301	0.0316042	-2.11171	0.0357063	-6.33746
cg07674804	-0.0732044	0.42956	0.0494756	-2.11052	0.0358098	-6.33994
cg22572476	-0.0519073	0.572223	0.0353398	-2.11038	0.0358224	-6.34025
cg10915739	-0.0531812	0.301916	0.0361912	-2.11021	0.0358367	-6.34059
cg02932204	-0.0496944	0.260909	0.0338591	-2.10908	0.0359355	-6.34295	PDZD7
cg16006841	-0.114574	0.406068	0.0763449	-2.10637	0.0361717	-6.34857	RGS14
cg02304584	-0.0614327	0.565911	0.041688	-2.10462	0.0363258	-6.35221
cg27535677	-0.0666612	0.636107	0.0451548	-2.1004	0.0366986	-6.36096
cg07021052	0.0704307	0.320673	0.0500301	2.1	0.0367339	-6.36178
cg02466788	-0.0629497	0.698177	0.0426951	-2.09584	0.0371048	-6.37039
cg09831645	0.0430366	0.128728	0.0302801	2.09523	0.0371592	-6.37164	C6orf165
cg21970626	-0.0459283	0.653886	0.0313336	-2.09221	0.0374309	-6.37788
cg22687569	-0.0485035	0.722941	0.0330612	-2.09034	0.0376007	-6.38175
cg14544666	-0.0462605	0.319931	0.0315567	-2.08831	0.037785	-6.38594	RASGEF1C
cg21302397	0.0443104	0.467553	0.0311902	2.0861	0.0379859	-6.39047	AP2A2;AP2A2
cg12378132	-0.0720017	0.304719	0.0486829	-2.08576	0.0380173	-6.39118
cg25279747	-0.091808	0.510407	0.0616539	-2.08391	0.038187	-6.39499
cg14939821	0.0463169	0.298064	0.0326253	2.07868	0.0386693	-6.40572	DOCK1;FAM196A
cg13666471	0.0432733	0.765056	0.0304491	2.07599	0.0389199	-6.41123	ST3GAL3;ST3GAL3;ST3GAL3;ST3GAL3;ST3GAL3;ST3GAL3;ST3GAL3;ST3GAL3;ST3GAL3;ST3GAL3;ST3GAL3;ST3GAL3;ST3GAL3;ST3GAL3;ST3GAL3;ST3GAL3;ST3GAL3;ST3GAL3;ST3GAL3;ST3GAL3;ST3GAL3;ST3GAL3;ST3GAL3;ST3GAL3;ST3GAL3
cg26840333	-0.048753	0.706729	0.0332284	-2.07597	0.0389217	-6.41127
cg00637745	0.0593391	0.596057	0.0419883	2.07538	0.0389769	-6.41248
cg20219891	0.0544486	0.744151	0.0384621	2.07065	0.039421	-6.42216
cg07187202	-0.0541617	0.617436	0.0368461	-2.06779	0.0396913	-6.42799
cg18621232	0.0494807	0.515128	0.0348924	2.06625	0.0398375	-6.43113	NKAIN1
cg15548198	0.0478736	0.40349	0.0337402	2.06557	0.0399025	-6.43252	PCDHB12
cg12869830	0.0471183	0.618258	0.0331991	2.06041	0.0403968	-6.44302	POU2F3;POU2F3
cg09131949	0.0446943	0.759317	0.0314646	2.05754	0.0406747	-6.44887
cg19530168	-0.0547546	0.669358	0.0372418	-2.05551	0.0408716	-6.45298
cg02091185	0.0553687	0.756191	0.0391246	2.05336	0.0410813	-6.45734	RANBP17
cg22273830	0.0867974	0.420612	0.0620101	2.05237	0.0411777	-6.45934	SLC43A2;SLC43A2;SLC43A2
cg18872420	0.0817703	0.689766	0.0583159	2.0511	0.0413025	-6.46192	SPTLC2
cg02447462	-0.0619166	0.532293	0.0420094	-2.04942	0.0414679	-6.46532	CFD
cg23284931	-0.068799	0.762845	0.0465686	-2.04876	0.0415322	-6.46664	SPON1
cg14748380	-0.0447428	0.580157	0.0305373	-2.04018	0.0423864	-6.48397	FAM163A
cg26467422	-0.0551629	0.307051	0.0375143	-2.04008	0.0423963	-6.48417	ADAM33;ADAM33;ADAM33
cg03834411	0.0701462	0.735289	0.0498231	2.03847	0.0425585	-6.48742	JPH3
cg10929690	-0.0466411	0.628546	0.0318121	-2.03742	0.0426636	-6.48951
cg04806653	-0.0505258	0.15162	0.0344157	-2.03736	0.0426696	-6.48963	CELF4;CELF4;CELF4;CELF4
cg09826759	-0.0482992	0.801873	0.0329242	-2.03618	0.0427897	-6.49202
cg26764761	0.0817026	0.763278	0.0582662	2.02926	0.0434941	-6.5059	JPH3
cg14317533	-0.0791697	0.488626	0.0533977	-2.02792	0.0436314	-6.50858
cg27219185	0.0936647	0.495595	0.0670773	2.02786	0.0436384	-6.50871
cg10218876	-0.0489664	0.180275	0.0333714	-2.02434	0.0440011	-6.51574	TNNT1;TNNT1;TNNT1
cg27074582	0.0708587	0.558537	0.0503417	2.02184	0.0442613	-6.52075	HDAC4
cg17221813	0.0760055	0.444415	0.0540954	2.02045	0.0444063	-6.52352	SLC17A9
cg02313554	-0.0544333	0.451158	0.0370274	-2.02007	0.0444461	-6.52428
cg01359822	0.0593759	0.626576	0.0420149	2.02	0.0444535	-6.52442	ETS2
cg27628201	0.050366	0.494934	0.0355276	2.01652	0.0448178	-6.53135
cg23505604	0.0518231	0.417431	0.036574	2.01584	0.0448897	-6.53271
cg01723420	0.0550147	0.516426	0.0388697	2.00878	0.0456389	-6.54674	MIR5095;N4BP1
cg13511117	0.0466782	0.343964	0.032884	2.007	0.0458294	-6.55027	MX2
cg25399239	-0.0676207	0.324943	0.0457896	-2.00699	0.0458298	-6.55028
cg24450063	0.0522292	0.259688	0.0368658	2.00682	0.0458485	-6.55062	SLC25A44;SLC25A44
cg19488431	-0.0538676	0.55706	0.0366497	-2.0023	0.0463352	-6.55956
cg15634083	-0.0748111	0.292448	0.0505336	-2.0011	0.0464652	-6.56194	HLA-C
cg07909165	0.0491499	0.38799	0.0346551	2.00088	0.0464897	-6.56238	CD164;CD164;CD164;CD164;CD164
cg16338365	0.0472079	0.580884	0.0332632	2.00052	0.0465283	-6.56309
cg16927689	0.0469162	0.544287	0.0330544	1.99903	0.0466911	-6.56604
cg04681450	-0.0697072	0.630048	0.0471686	-1.9958	0.0470439	-6.57241	TRAP1;TRAP1
cg07680260	0.0458924	0.187178	0.0323215	1.99537	0.0470908	-6.57325	GRM5;GRM5
cg15458017	-0.055444	0.478781	0.0377018	-1.99511	0.0471194	-6.57377
cg13315147	-0.0576673	0.275897	0.0391836	-1.995	0.0471317	-6.57399	CYP2E1
cg26423139	0.0902723	0.438886	0.0645711	1.98981	0.0477045	-6.5842	SLC43A2;SLC43A2;SLC43A2
cg26967960	0.0471041	0.468932	0.033189	1.98512	0.0482269	-6.59341	CAV3;CAV3
cg03134882	-0.059118	0.25442	0.0401492	-1.98454	0.0482918	-6.59454	CYP2E1
cg06991787	0.0479963	0.390368	0.0338281	1.98341	0.0484186	-6.59676	ADCY9
cg13126279	-0.0533357	0.703605	0.0362945	-1.97972	0.0488348	-6.60399	C21orf56;C21orf56
cg05857999	-0.0741731	0.461099	0.0501136	-1.97851	0.0489719	-6.60635
cg00730971	-0.0445404	0.462505	0.0304013	-1.97513	0.049356	-6.61295	VPS13C;VPS13C;VPS13C;VPS13C
cg17349054	-0.0475954	0.625402	0.0324524	-1.97377	0.0495118	-6.61561
cg20245362	-0.0465291	0.547381	0.031737	-1.97159	0.0497622	-6.61986
cg14047961	-0.0519631	0.366229	0.0353771	-1.96994	0.0499516	-6.62306	LOC388780

## Sheet: SM Table 8
Overview of Top DMRs for Specific Effects (with lowest nominal p < 0.05 and FDR > 0.99)
Model: Methylation ~ AP vs (AP2 + MedFree) + Sex + Age + Smoking score + Diagnosis + Technical Batch + Cell counts
	Gene		Genomic location	Nr CpGs	P-value	DMR Effect Size	SE	FDR
Olanzapine vs. Group
	GIPC3		chr19: 3585280 - 3585434	3	1.939e-05	0.3143	0.092	NS
Quetiapine vs. Group
	MIR1257		chr20: 60528916-60529384	3	3.702e-06	0.6393	0.138	NS
Risperidone vs. Group
	MYEOV2		chr2: 241076208 - 241077006	16	4.413e-05	-0.4988	0.122	NS
	(COPS9)
